# Supplementary material
Source: ML conference proceedings conference paper supplement (https://openreview.net/forum?id=6JJq5TW9Mc)
Supplement: supplementary_material [file attachment]

---

# Appendix for “Learning World Models with Identifiable Factorization”

---

Anonymous Author(s)

Affiliation

Address

email

1 Appendix organization:

2

|    |                                                       |           |
|----|-------------------------------------------------------|-----------|
| 3  | <b>S1 Theoretical Proofs</b>                          | <b>2</b>  |
| 4  | S1.1 Proof of Proposition 1 . . . . .                 | 2         |
| 5  | S1.2 Proof of Proposition 2 . . . . .                 | 2         |
| 6  | S1.3 Proof of Proposition 3 . . . . .                 | 3         |
| 7  | S1.4 Proof of Theorem 1 . . . . .                     | 3         |
| 8  | <b>S2 Derivation of the objective function</b>        | <b>7</b>  |
| 9  | S2.1 Discussions . . . . .                            | 9         |
| 10 | <b>S3 Environment descriptions</b>                    | <b>11</b> |
| 11 | S3.1 Synthetic data . . . . .                         | 11        |
| 12 | S3.2 Modified Cartpole . . . . .                      | 11        |
| 13 | S3.3 Variant of Robodesk . . . . .                    | 11        |
| 14 | S3.4 Variants of DeepMind Control Suite . . . . .     | 12        |
| 15 | <b>S4 Experimental Details</b>                        | <b>13</b> |
| 16 | S4.1 Synthetic Dataset . . . . .                      | 13        |
| 17 | S4.1.1 Extra Results. . . . .                         | 14        |
| 18 | S4.2 Modified Cartpole . . . . .                      | 14        |
| 19 | S4.3 Variant of Robodesk . . . . .                    | 14        |
| 20 | S4.4 Variants of Deep Mind Control Suite . . . . .    | 15        |
| 21 | S4.4.1 Extra Results. . . . .                         | 15        |
| 22 | S4.5 Visualization for DMC . . . . .                  | 16        |
| 23 | <b>S5 Comparison between IFactor and Denoised MDP</b> | <b>18</b> |

24

## 25 S1 Theoretical Proofs

### 26 S1.1 Proof of Proposition 1

27 Proposition 1 shows that  $s_t^r$ , which has directed paths to  $r_{t+\tau}$  (for  $\tau \geq 0$ ), is minimally sufficient for  
 28 policy learning that aims to maximize the future reward and can be characterized by conditional  
 29 dependence with the cumulative reward variable  $R_t$ .

30 **Proposition 1.** *Under the assumption that the graphical representation, corresponding to the*  
 31 *environment model, is Markov and faithful to the measured data,  $s_t^r \subseteq \mathbf{s}_t$  is a minimal subset of state*  
 32 *dimensions that are sufficient for policy learning, and  $s_{i,t} \in s_t^r$  if and only if  $s_{i,t} \not\perp R_t | a_{t-1}, s_{t-1}^r$ .*

33 We first give the definitions of the Markov condition and the faithfulness assumption, which will be  
 34 used in the proof.

35 **Definition 1** (Global Markov Condition [1, 2]). *The distribution  $p$  over a set of variables  $\mathbf{V}$  satisfies*  
 36 *the global Markov property on graph  $G$  if for any partition  $(A, B, C)$  such that if  $B$   $d$ -separates  $A$*   
 37 *from  $C$ , then  $p(A, C|B) = p(A|B)p(C|B)$ .*

38 **Definition 2** (Faithfulness Assumption [1, 2]). *There are no independencies between variables that*  
 39 *are not entailed by the Markov Condition in the graph.*

40 Below, we give the proof of Proposition 1.

41 *Proof.* The proof contains the following three steps.

- 42 • In step 1, we show that a state dimension  $s_{i,t}$  is in  $s_t^r$ , that is, it has a directed path to  $r_{t+\tau}$ , if  
 43 and only if  $s_{i,t} \not\perp R_t | a_{t-1}, \mathbf{s}_{t-1}$ .
- 44 • In step 2, we show that for  $s_{i,t}$  with  $s_{i,t} \not\perp R_t | a_{t-1}, \mathbf{s}_{t-1}$ , if and only if  $s_{i,t} \not\perp R_t | a_{t-1}, s_{t-1}^r$ .
- 45 • In step 3, we show that  $s_t^r$  are minimally sufficient for policy learning.

46 **Step 1:** We first show that if a state dimension  $s_{i,t}$  is in  $s_t^r$ , then  $s_{i,t} \not\perp R_t | a_{t-1}, \mathbf{s}_{t-1}$ .

47 We prove it by contradiction. Suppose that  $s_{i,t}$  is independent of  $R_t$  given  $a_{t-1}$  and  $\mathbf{s}_{t-1}$ . Then according  
 48 to the faithfulness assumption, we can see from the graph that  $s_{i,t}$  does not have a directed path to  $r_{t+\tau}$ ,  
 49 which contradicts the assumption, because, otherwise,  $a_{t-1}$  and  $\mathbf{s}_{t-1}$  cannot break the paths between  
 50  $s_{i,t}$  and  $R_t$  which leads to the dependence.

51 We next show that if  $s_{i,t} \not\perp R_t | a_{t-1}, \mathbf{s}_{t-1}$ , then  $s_{i,t} \in s_t^r$ .

52 Similarly, by contradiction suppose that  $s_{i,t}$  does not have a directed path to  $r_{t+\tau}$ . From the graph, it is  
 53 easy to see that  $a_{t-1}$  and  $\mathbf{s}_{t-1}$  must  $d$ -separate the path between  $s_{i,t}$  and  $R_t$ . According to the Markov  
 54 assumption,  $s_{i,t}$  is independent of  $R_t$  given  $a_{t-1}$  and  $\mathbf{s}_{t-1}$ , which contradicts to the assumption. Since  
 55 we have a contradiction, it must be that  $s_{i,t}$  has a directed path to  $r_{t+\tau}$ , i.e.  $s_{i,t} \in s_t^r$ .

56 **Step 2:** In step 1, we have shown that  $s_{i,t} \not\perp R_t | a_{t-1}, \mathbf{s}_{t-1}$ , if and only if it has a directed path to  $r_{t+\tau}$ .  
 57 From the graph, it is easy to see that for those state dimensions which have a directed path to  $r_{t+\tau}$ ,  
 58  $a_{t-1}$  and  $\mathbf{s}_{t-1}$  cannot break the path between  $s_{i,t}$  and  $R_t$ . Moreover, for those state dimensions which  
 59 do not have a directed path to  $r_{t+\tau}$ ,  $a_{t-1}$  and  $s_{t-1}^r$  are enough to break the path between  $s_{i,t}$  and  $R_t$ .

60 Therefore, for  $s_{i,t}$ ,  $s_{i,t} \not\perp R_t | a_{t-1}, \mathbf{s}_{t-1}$ , if and only if  $s_{i,t} \not\perp R_{t+1} | a_{t-1}, s_{t-1}^r$ .

61 **Step 3:** In the previous steps, it has been shown that if a state dimension  $s_{i,t}$  is in  $s_t^r$ , then  $s_{i,t} \not\perp$   
 62  $R_t | a_{t-1}, s_{t-1}^r$ , and if a state dimension  $s_{i,t}$  is not in  $s_t^r$ , then  $s_{i,t} \perp R_t | a_{t-1}, s_{t-1}^r$ . This implies that  $s_t^r$  are  
 63 minimally sufficient for policy learning to maximize the future reward.  $\square$

### 64 S1.2 Proof of Proposition 2

65 Moreover, the proposition below shows that  $s_t^a$ , which receives an edge from  $a_{t-1}$ , can be directly  
 66 controlled by actions and can be characterized by conditional dependence with the action variable.

67 **Proposition 2.** Under the assumption that the graphical representation, corresponding to the  
 68 environment model, is Markov and faithful to the measured data,  $s_t^a \subseteq \mathbf{s}_t$  is a minimal subset of state  
 69 dimensions that are sufficient for direct control, and  $s_{i,t} \in s_t^a$  if and only if  $s_{i,t} \not\perp a_{t-1} | \mathbf{s}_{t-1}$ .

70 Below, we give the proof of Proposition 2.

71 *Proof.* The proof contains the following two steps.

- 72 • In step 1, we show that a state dimension  $s_{i,t}$  is in  $s_t^a$ , that is, it receives an edge from  $a_{t-1}$ , if  
 73 and only if  $s_{i,t} \not\perp a_{t-1} | \mathbf{s}_{t-1}$ .
- 74 • In step 2, we show that  $s_t^a$  contains a minimally sufficient subset of state dimensions that can  
 75 be directly controlled by actions.

76 **Step 1:** We first show that if a state dimension  $s_{i,t}$  is in  $s_t^a$ , then  $s_{i,t} \not\perp a_{t-1} | \mathbf{s}_{t-1}$ .

77 We prove it by contradiction. Suppose that  $s_{i,t}$  is independent of  $a_{t-1}$  given  $\mathbf{s}_{t-1}$ . Then according to  
 78 the faithfulness assumption, we can see from the graph that  $s_{i,t}$  does not receive an edge from  $a_{t-1}$ ,  
 79 which contradicts the assumption, because, otherwise,  $\mathbf{s}_{t-1}$  cannot break the paths between  $s_{i,t}$  and  
 80  $a_{t-1}$  which leads to the dependence.

81 We next show that if  $s_{i,t} \not\perp a_{t-1} | \mathbf{s}_{t-1}$ , then  $s_{i,t} \in s_t^a$ .

82 Similarly, by contradiction suppose that  $s_{i,t}$  does not receive an edge from  $a_{t-1}$ . From the graph,  
 83 it is easy to see that  $\mathbf{s}_{t-1}$  must break the path between  $s_{i,t}$  and  $a_{t-1}$ . According to the Markov  
 84 assumption,  $s_{i,t}$  is independent of  $a_{t-1}$  given  $\mathbf{s}_{t-1}$ , which contradicts to the assumption. Since we have  
 85 a contradiction, it must be that  $s_{i,t}$  has an edge from  $a_{t-1}$ .

86 **Step 2:** In the previous steps, it has been shown that if a state dimension  $s_{i,t}$  is in  $s_t^a$ , then  $s_{i,t} \not\perp$   
 87  $a_{t-1} | \mathbf{s}_{t-1}$ , and if a state dimension  $s_{i,t}$  is not in  $s_t^a$ , then  $s_{i,t} \perp a_{t-1} | \mathbf{s}_{t-1}$ . This implies that  $s_t^a$  is  
 88 minimally sufficient for one-step direct control.  $\square$

### 89 S1.3 Proof of Proposition 3

90 Furthermore, based on Proposition 1 and Proposition 2, we can further differentiate  $s_t^{ar}$ ,  $s_t^{\bar{ar}}$ ,  $s_t^{\bar{r}}$  from  
 91  $s_t^r$  and  $s_t^a$ , which is given in the following proposition.

92 **Proposition 3.** Under the assumption that the graphical representation, corresponding to the  
 93 environment model, is Markov and faithful to the measured data, we can build a connection between  
 94 the graph structure and statistical independence of causal variables in the RL system, with (1)  $s_{i,t} \in s_t^{ar}$   
 95 if and only if  $s_{i,t} \not\perp R_t | a_{t-1}, s_{t-1}^r$  and  $s_{i,t} \not\perp a_{t-1} | \mathbf{s}_{t-1}$ , (2)  $s_{i,t} \in s_t^{\bar{ar}}$  if and only if  $s_{i,t} \not\perp R_t | a_{t-1}, s_{t-1}^r$  and  
 96  $s_{i,t} \perp a_{t-1} | \mathbf{s}_{t-1}$ , (3)  $s_{i,t} \in s_t^{\bar{r}}$  if and only if  $s_{i,t} \perp R_t | a_{t-1}, s_{t-1}^r$  and  $s_{i,t} \not\perp a_{t-1} | \mathbf{s}_{t-1}$ , and (4)  $s_{i,t} \in s_t^{\bar{r}}$  if  
 97 and only if  $s_{i,t} \perp R_t | a_{t-1}, s_{t-1}^r$  and  $s_{i,t} \perp a_{t-1} | \mathbf{s}_{t-1}$ .

98 *Proof.* This proposition can be easily proved by leveraging the results from Propositions 1 and 2.  $\square$

### 99 S1.4 Proof of Theorem 1

100 According to the causal process in the RL system (as described in Eq.1 in [3]), we can build the  
 101 following mapping from latent state variables  $\mathbf{s}_t$  to observed variables  $o_t$  and future cumulative reward  
 102  $R_t$ :

$$[o_t, R_t] = f(s_t^r, s_t^{\bar{r}}, \eta_t), \quad (1)$$

103 where

$$\begin{aligned} o_t &= f_1(s_t^r, s_t^{\bar{r}}), \\ R_t &= f_2(s_t^r, \eta_t). \end{aligned} \quad (2)$$

104 Here, note that to recover  $s_t^r$ , it is essential to take into account all future rewards  $r_{t:T}$ , because any  
 105 state dimension  $s_{i,t} \in \mathbf{s}_t$  that has a directed path to the future reward  $r_{t+\tau}$ , for  $\tau > 0$ , is involved in  
 106  $s_t^r$ . Hence, we consider the mapping from  $s_t^r$  to the future cumulative reward  $R_t$ , and  $\eta_t$  represents  
 107 residuals, except  $s_t^r$ , that have an effect to  $R_t$ .

The following theorem shows that the different types of states  $s_t^{ar}$ ,  $s_t^{\bar{ar}}$ ,  $s_t^{a\bar{r}}$ , and  $s_t^{\bar{a}\bar{r}}$  are blockwise identifiable from observed image variable  $o_t$ , reward variable  $r_t$ , and action variable  $a_t$ , under reasonable and weak assumptions.

**Theorem 1.** Suppose that the causal process in the RL system and the four categories of latent state variables can be described as that in Section 2 and illustrated in Figure 1(c). Under the following assumptions

A1. The mapping  $f$  in Eq. 1 is smooth and invertible with smooth inverse.

A2. For all  $i \in \{1, \dots, d_o + d_R\}$  and  $j \in \mathcal{F}_{i,:}$ , there exist  $\{\tilde{\mathbf{s}}_t^{(l)}\}_{l=1}^{|\mathcal{F}_{i,:}|}$ , so that  $\text{span}\{\mathbf{J}_f(\tilde{\mathbf{s}}_t^{(l)})_{i,:}\}_{l=1}^{|\mathcal{F}_{i,:}|} = \mathbb{R}_{\mathcal{F}_{i,:}}^{d_s}$ , and there exists a matrix  $T$  with its support identical to that of  $\mathbf{J}_{\hat{f}}^{-1}(\hat{\mathbf{s}}_t)\mathbf{J}_f(\tilde{\mathbf{s}}_t)$ , so that  $[\mathbf{J}_f(\tilde{\mathbf{s}}_t^{(l)})T]_{j,:} \in \mathbb{R}_{\mathcal{F}_{i,:}}^{d_s}$ .

Then, reward-relevant and controllable states  $s_t^{ar}$ , reward-relevant but not controllable states  $s_t^{\bar{ar}}$ , reward-irrelevant but controllable states  $s_t^{a\bar{r}}$ , and noise  $s_t^{\bar{a}\bar{r}}$ , are blockwise identifiable.

In the theorem presented above, Assumption A1 only assumes the invertibility of function  $f$ , while functions  $f_1$  and  $f_2$  are considered general and not necessarily invertible. Since the function  $f$  is the mapping from all (latent) variables, including noise factors, that influence the observed variables, the invertibility assumption holds reasonably. However, note that it is not reasonable to assume the invertibility of the function  $f_2$  since usually, the reward function is not invertible. Assumption A2, which is also given in [4, 5], aims to establish a more generic condition that rules out certain sets of parameters to prevent ill-posed conditions. Specifically, it ensures that the Jacobian is not partially constant. This condition is typically satisfied asymptotically, and it is necessary to avoid undesirable situations where the problem becomes ill-posed.

*Proof.* The proof consists of four steps.

1. In step 1, we show that  $s_t^a = s_t^{ar} \cup s_t^{a\bar{r}}$  is blockwise identifiable, by using the characterization that the action variable  $a_t$  only directly influences  $s_t^{ar}$  and  $s_t^{a\bar{r}}$ .
2. In step 2, we show that  $s_t^r = s_t^{ar} \cup s_t^{\bar{ar}}$  is blockwise identifiable, by using the characterization that the future cumulative reward  $R_t$  is only influenced by  $s_t^{ar}$  and  $s_t^{\bar{ar}}$ .
3. In step 3, we show that  $s_t^{ar}$  is blockwise identifiable, by using the identifiability of  $s_t^{ar} \cup s_t^{a\bar{r}}$  and  $s_t^{ar} \cup s_t^{\bar{ar}}$ .
4. In step 4, we further show the blockwise identifiability of  $s_t^{\bar{ar}}$ ,  $s_t^{a\bar{r}}$ , and  $s_t^{\bar{a}\bar{r}}$ .

**Step 1: prove the block identifiability of  $s_t^a$ .**

For simplicity of notation, below, we omit the subscript  $t$ .

Let  $h := f^{-1} \circ \hat{f}$ . We have

$$\hat{\mathbf{s}} = h(\mathbf{s}), \quad (3)$$

where  $h = f^{-1} \circ \hat{f}$  is the transformation between the true latent variable and the estimated one, and  $\hat{f} : \mathcal{S} \rightarrow \mathcal{X}$  denotes the estimated invertible generating function. Note that as both  $f^{-1}$  and  $\hat{f}$  are smooth and invertible,  $h$  and  $h^{-1}$  is smooth and invertible.

Since  $h(\cdot)$  is smooth over  $\mathcal{S}$ , its Jacobian can be written as follows:

$$J_{h^{-1}} = \begin{bmatrix} A := \frac{\partial s^{\bar{a}}}{\partial \hat{s}^a} & B := \frac{\partial s^{\bar{a}}}{\partial \hat{s}^a} \\ C := \frac{\partial s^a}{\partial \hat{s}^a} & D := \frac{\partial s^a}{\partial \hat{s}^a} \end{bmatrix} \quad (4)$$

The invertibility of  $h^{-1}$  implies that  $J_{h^{-1}}$  is full rank. Since  $s^a$  has changing distributions over the action variable  $a$  while  $s^{\bar{a}}$  has invariant distributions over different values of  $a$ , we can derive that  $C = 0$ . Furthermore, because  $J_{h^{-1}}$  is full rank and  $C$  is a zero matrix,  $D$  must be of full rank, which implies  $h_a^{-1}$  is invertible, where  $h_a^{-1}$  denotes the first derivative of  $h_a^{-1}$ . Therefore,  $s^a$  is blockwise identifiable up to invertible transformations.

150 **Step 2: prove the blockwise identifiability of  $s_t^r$ .**

151

152 Recall that we have the following mapping:

$$[o_t, R_t] = f(s_t^r, s_t^{\bar{r}}, \eta_t),$$

153 where

$$\begin{aligned} o_t &= f_1(s_t^r, s_t^{\bar{r}}), \\ R_t &= f_2(s_t^r, \eta_t). \end{aligned}$$

154 Note that here to recover  $s_t^r$ , we need to take into account all future rewards, because  $s_t^r$  contains  
155 all those state dimensions that have a directed path to future rewards  $r_{t+1:T}$ .  $\eta_t$  represents all other  
156 factors, except  $s_t^r$ , that influence  $R_t$  at time instance  $t$ . Further note here we assume the invertibility of  
157  $f$ , while  $f_1$  and  $f_2$  are general functions not necessarily invertible.

158 We denote by  $\tilde{\mathbf{s}} = (s^r, s^{\bar{r}}, \eta)$ . We further denote by the dimension of  $s^r$  by  $d_{s^r}$ , the dimension of  $s^{\bar{r}}$  by  
159  $d_{s^{\bar{r}}}$ , the dimension of  $\tilde{\mathbf{s}}$  by  $d_{\tilde{\mathbf{s}}}$ , the dimension of  $o$  by  $d_o$ , and the dimension of  $R_t$  by  $d_R$ .

160 We denote by  $\mathcal{F}$  the support of  $\mathbf{J}_f(\mathbf{s})$ , by  $\hat{\mathcal{F}}$  the support of  $\mathbf{J}_{\hat{f}}(\hat{\mathbf{s}})$ , and by  $\mathcal{T}$  the support of  $\mathbf{T}(\mathbf{s})$ . We  
161 also denote  $T$  as a matrix with the same support as  $\mathcal{T}$ . The proof technique is similar to that in [4, 5].

162 Since  $h := \hat{f}^{-1} \circ f$ , we have  $\hat{f} = f \circ h^{-1}(\tilde{\mathbf{s}})$ . By applying the chain rule repeatedly, we have

$$\mathbf{J}_{\hat{f}}(\hat{\mathbf{s}}) = \mathbf{J}_f(\tilde{\mathbf{s}}) \cdot \mathbf{J}_{h^{-1}}(h(\tilde{\mathbf{s}})). \quad (5)$$

163 With Assumption A2, for any  $i \in \{1, \dots, d_o + d_R\}$ , there exists  $\{\tilde{\mathbf{s}}^{(l)}\}_{l=1}^{|\mathcal{F}_{i,:}|}$ , s.t.  $\text{span}(\{\mathbf{J}_f(\tilde{\mathbf{s}}^{(l)})_{i,:}\}_{l=1}^{|\mathcal{F}_{i,:}|}) = \mathbf{R}_{\mathcal{F}_{i,:}}^{d_{\tilde{\mathbf{s}}}}$ .

164 Since  $\{\mathbf{J}_f(\tilde{\mathbf{s}}^{(l)})_{i,:}\}_{l=1}^{|\mathcal{F}_{i,:}|}$  forms a basis of  $\mathbf{R}_{\mathcal{F}_{i,:}}^{d_{\tilde{\mathbf{s}}}}$ , for any  $j_0 \in \mathcal{F}_{i,:}$ , we can write canonical basis vector  
165  $e_{j_0} \in \mathbf{R}_{\mathcal{F}_{i,:}}^{d_{\tilde{\mathbf{s}}}}$  as:

$$e_{j_0} = \sum_{l \in \mathcal{F}_{i,:}} \alpha_l \cdot \mathbf{J}_g(\tilde{\mathbf{s}}^{(l)})_{i,:}, \quad (6)$$

166 where  $\alpha_l \in \mathbb{R}$  is a coefficient.

167 Then, following Assumption A2, there exists a deterministic matrix  $T$  such that

$$T_{j_0,:} = e_{j_0}^\top T = \sum_{l \in \mathcal{F}_{i,:}} \alpha_l \cdot \mathbf{J}_g(\tilde{\mathbf{s}}^{(l)})_{i,:} T \in \mathbf{R}_{\hat{\mathcal{F}}_{i,:}}^{d_{\tilde{\mathbf{s}}}}, \quad (7)$$

168 where  $\in$  is due to that each element in the summation belongs to  $\mathbf{R}_{\hat{\mathcal{F}}_{i,:}}^{d_{\tilde{\mathbf{s}}}}$ .

169 Therefore,

$$\forall j \in \mathcal{F}_{i,:}, T_{j,:} \in \mathbf{R}_{\hat{\mathcal{F}}_{i,:}}^{d_{\tilde{\mathbf{s}}}}.$$

170 Equivalently, we have:

$$\forall (i, j) \in \mathcal{F}, \quad \{i\} \times T_{j,:} \subset \hat{\mathcal{F}}. \quad (8)$$

171 We would like to show that  $\hat{s}^r$  does not depend on  $s^{\bar{r}}$  and  $\eta$ , that is,  $T_{i,j} = 0$  for  $i \in \{1, \dots, d_{s^r}\}$  and  
172  $j \in \{d_{s^r} + 1, \dots, d_{\tilde{\mathbf{s}}}\}$ .

173 We prove it by contradiction. Suppose that  $\hat{s}^r$  had dependence on  $s^{\bar{r}}$ , that is,  $\exists (j_{s^r}, j_{s^{\bar{r}}}) \in \mathcal{T}$  with  
174  $j_{s^r} \in \{1, \dots, d_{s^r}\}$  and  $j_{s^{\bar{r}}} \in \{d_{s^r} + 1, \dots, d_{s^r} + d_{s^{\bar{r}}}\}$ .

175 Hence, there must exist  $i_r \in \{d_o + 1, \dots, d_o + d_R\}$ , such that,  $(i_r, j_{s^{\bar{r}}}) \in \mathcal{F}$ .

176 It follows from Equation 8 that:

$$\{i_r\} \times T_{j_{s^{\bar{r}}},:} \in \hat{\mathcal{F}} \implies (i_r, j_{s^r}) \in \hat{\mathcal{F}}. \quad (9)$$

177 However, due to the structure of  $\hat{f}_2$ ,  $[\mathbf{J}_{\hat{f}_2}]_{i_r, j_{s^{\bar{r}}}} = 0$ , which results in a contradiction. Therefore,  
178 such  $(i_r, j_{s^r})$  does not exist and  $\hat{s}^r$  does not depend on  $s^{\bar{r}}$ . The same reasoning implies that  $\hat{s}^r$  does  
179 not dependent on  $\eta$ . Thus,  $\hat{s}^r$  does not depend on  $(s^{\bar{r}}, \eta)$ . In conclusion,  $\hat{s}^r$  does not contain extra  
180 information beyond  $s^r$ .

181 Similarly, we can show that  $(\hat{s}^{\bar{r}}, \hat{\eta})$  does not contain information of  $s^r$ .

182 Therefore, there is a one-to-one mapping between  $s^r$  and  $\hat{s}^r$ .

183 **Step 3: prove the blockwise identifiability of  $s_l^{ar}$ .**

184

185 In Step 1 and Step 2, we have shown that both  $s^a$  and  $s^r$  are blockwise identifiable. That is,

$$\begin{aligned}\hat{s}^r &= h_r(s^r), \\ \hat{s}^a &= h_a(s^a),\end{aligned}\tag{10}$$

186 where  $h_a$  and  $h_r$  are invertible functions.

187 According to the invariance relation of  $s^{ar}$ , We have the following relations:

$$\hat{s}^{ar} = h_r(s^r)_{1:d_{sar}} = h_a(s^a)_{1:d_{sar}}.\tag{11}$$

188 It remains to show that both  $\tilde{h}_r := h_r(\cdot)_{1:d_{sar}}$  and  $\tilde{h}_a := h_a(\cdot)_{1:d_{sar}}$  do not depend on  $s^{\bar{ar}}$  and  $s^{a\bar{r}}$  in their arguments.

190 We will prove this by contradiction. Without loss of generality, we suppose  $\exists l \in \{1, \dots, d_{\bar{ar}}\}$ ,  
191  $s^{r*} \in \mathcal{S}^r$ , s.t.,  $\frac{\partial \tilde{h}_r}{\partial s_l^{ar}}(s^{r*}) \neq 0$ . As  $h$  is smooth, it has continuous partial derivatives. Thus,  $\frac{\partial \tilde{h}_r}{\partial s_l^{ar}} \neq 0$  holds  
192 true in a neighbourhood of  $s^{r*}$ , i.e.,

$$\exists \eta > 0, \text{ s.t., } s_l^{\bar{ar}} \rightarrow \tilde{h}_r(s^{ar*}, (s_{-l}^{\bar{ar}*}, s_l^{\bar{ar}*})) \text{ is strictly monotonic on } (s_l^{\bar{ar}*} - \eta, s_l^{\bar{ar}*} + \eta),\tag{12}$$

193 where  $s_{-l}^{\bar{ar}}$  denotes variable  $s^{\bar{ar}}$  excluding the dimension  $l$ .

194 We further define an auxiliary function  $\psi : \mathcal{S}^{ar} \times \mathcal{S}^{\bar{ar}} \times \mathcal{S}^{a\bar{r}} \rightarrow \mathbb{R}_{\geq 0}$  as follows:

$$\psi(s^{ar}, s^{\bar{ar}}, s^{a\bar{r}}) := |\tilde{h}_r(s^r) - \tilde{h}_a(s^a)|.\tag{13}$$

195 To obtain the contradiction to the invariance, it remains to show that  $\psi > 0$  with a probability greater  
196 than zero w.r.t. the true generating process.

197 There are two situations at  $(s^{ar*}, s^{\bar{ar}*}, s^{a\bar{r}*})$  where  $s^{\bar{ar}*}$  is an arbitrary point in  $\mathcal{S}^{\bar{ar}}$ :

- 198 • situation 1:  $\psi(s^{ar*}, s^{\bar{ar}*}, s^{a\bar{r}*}) > 0$ ;
- 199 • situation 2:  $\psi(s^{ar*}, s^{\bar{ar}*}, s^{a\bar{r}*}) = 0$ .

200 In situation 1, we have identified a specific point  $\psi(s^{ar*}, s^{\bar{ar}*}, s^{a\bar{r}*})$  that makes  $\psi > 0$ .

201 In situation 2, Eq. 12 implies that  $\forall s_l^{\bar{ar}} \in (s_l^{\bar{ar}*}, s_l^{\bar{ar}*} + \eta)$

$$\psi(s^{ar*}, (s_{-l}^{\bar{ar}*}, s_l^{\bar{ar}}), s^{a\bar{r}*}) > 0.$$

202 Thus, in both situations, we can locate a point  $(s^{ar*}, s^{\bar{ar}*'}, s^{a\bar{r}*})$  such that  $\psi(s^{ar*}, s^{\bar{ar}*'}, s^{a\bar{r}*}) > 0$ , where  
203  $s^{\bar{ar}*'} = s^{\bar{ar}*}$  in case 1 and  $s_l^{\bar{ar}*'} \in (s_l^{\bar{ar}*}, s_l^{\bar{ar}*} + \eta)$ ,  $s_{-l}^{\bar{ar}*'} = s_{-l}^{\bar{ar}*}$  in situation 2.

204 Since  $\psi$  is a composition of continuous functions, it is continuous. As pre-image of open sets are  
205 always open for continuous functions, the open set  $\mathbb{R}_{>0}$  has an open set  $\mathcal{U} \in \mathcal{S}^{ar} \times \mathcal{S}^{\bar{ar}} \times \mathcal{S}^{a\bar{r}}$  as  
206 its preimage. Due to  $(s^{ar*}, s^{\bar{ar}*'}, s^{a\bar{r}*}) \in \mathcal{U}$ ,  $\mathcal{U}$  is nonempty. As  $\mathcal{U}$  is nonempty and open,  $\mathcal{U}$  has a  
207 Lebesgue measure of greater than zero.

208 As we assume that  $p_{s^{ar}, s^{\bar{ar}}, s^{a\bar{r}}}$  is fully supported over the entire domain  $\mathcal{S}^{ar} \times \mathcal{S}^{\bar{ar}} \times \mathcal{S}^{a\bar{r}}$ , we can deduce  
209 that  $\mathbb{P}_p[\mathcal{U}] > 0$ . That is,  $\psi > 0$  with a probability greater than zero, which contradicts the invariance  
210 condition. Therefore, it has been shown that  $\hat{h}_r(s^r)$  does not depend on  $s^{\bar{ar}}$ . This proof technique is  
211 related to that in [6].

212 Similarly, we can show that  $\hat{h}_a(s^a)$  does not depend on  $s^{a\bar{r}}$ .

213 Finally, the smoothness and invertibility of  $\hat{h}_r$  and  $\hat{h}_a$  follow from the smoothness and invertibility of  
214  $h_r$  and  $h_a$  over the entire domain.

215 Therefore,  $h_r(h_a)$  is a smooth invertible mapping between  $s^{ar}$  and  $\hat{s}^{ar}$ . That is,  $s^{ar}$  is blockwise  
216 invertible.

217 **Step 4: prove the blockwise identifiability of  $s_t^{\bar{a}r}$ ,  $s_t^{a\bar{r}}$ , and  $s_t^{\bar{a}\bar{r}}$ .**

218

219 We can use the same technique in Step 3 to show the identifiability of  $s_t^{\bar{a}r}$  and  $s_t^{a\bar{r}}$ . Specifically,  
 220 since  $s_r$  and  $s^{ar}$  are identifiable, we can show that  $s_t^{\bar{a}r}$  is identifiable. Similarly, since  $s^a$  and  $s^{ar}$  are  
 221 identifiable, we can show that  $s_t^{a\bar{r}}$  is identifiable. Furthermore, since  $s^{ar}$ ,  $s_t^{\bar{a}r}$ , and  $s_t^{a\bar{r}}$  are identifiable,  
 222 we can show that  $s_t^{\bar{a}\bar{r}}$  is identifiable  $\square$

## 223 S2 Derivation of the objective function

224 We start by defining the components of the world mode as follows:

$$\begin{cases} \text{Observation Model:} & p_\theta(o_t | \mathbf{s}_t) \\ \text{Reward Model:} & p_\theta(r_t | s_t^r) \\ \text{Transition Model:} & p_\gamma(\mathbf{s}_t | \mathbf{s}_{t-1}, a_{t-1}) \\ \text{Representation Model:} & q_\phi(\mathbf{s}_t | o_t, \mathbf{s}_{t-1}, a_{t-1}) \end{cases} \quad (14)$$

225 The latent dynamics can be disentangled into four catogories:

$$\begin{array}{ll} \text{Disentangled Transition Model:} & \text{Disentangled Representation Model:} \\ \left\{ \begin{array}{l} p_{\gamma_1}(s_t^{ar} | s_{t-1}^r, a_{t-1}) \\ p_{\gamma_2}(s_t^{\bar{a}r} | s_{t-1}^r) \\ p_{\gamma_3}(s_t^{a\bar{r}} | \mathbf{s}_{t-1}, a_{t-1}) \\ p_{\gamma_4}(s_t^{\bar{a}\bar{r}} | \mathbf{s}_{t-1}) \end{array} \right. & \left\{ \begin{array}{l} q_{\phi_1}(s_t^{ar} | o_t, s_{t-1}^r, a_{t-1}) \\ q_{\phi_2}(s_t^{\bar{a}r} | o_t, s_{t-1}^r) \\ q_{\phi_3}(s_t^{a\bar{r}} | o_t, \mathbf{s}_{t-1}, a_{t-1}) \\ q_{\phi_4}(s_t^{\bar{a}\bar{r}} | o_t, \mathbf{s}_{t-1}) \end{array} \right. \end{array} \quad (15)$$

226 We define the information bottleneck objective for latent dynamics models [7, 8]

$$\max I(\mathbf{s}_{1:T}; (o_{1:T}, r_{1:T}) | a_{1:T}) - \beta \cdot I(\mathbf{s}_{1:T}, i_{1:T} | a_{1:T}), \quad (16)$$

227 where  $\beta$  is scalar and  $i_t$  are dataset indices that determine the observations  $p(o_t | i_t) = \delta(o_t - \bar{o}_t)$  as in  
 228 [9].

229 Maximizing the objective leads to model states that can predict the sequence of observations and  
 230 rewards while limiting the amount of information extracted at each time step. We derive the lower  
 231 bound of the first term in Equation 16:

$$\begin{aligned} & I(\mathbf{s}_{1:T}; (o_{1:T}, r_{1:T}) | a_{1:T}) \\ &= \mathbb{E}_{q(o_{1:T}, r_{1:T}, \mathbf{s}_{1:T}, a_{1:T})} \left( \sum_t \ln p(o_{1:T}, r_{1:T} | \mathbf{s}_{1:T}, a_{1:T}) - \ln p(o_{1:T}, r_{1:T} | a_{1:T}) \right) \\ & \pm \mathbb{E} \left( \sum_t \ln p(o_{1:T}, r_{1:T} | \mathbf{s}_{1:T}, a_{1:T}) \right) \\ & \geq \mathbb{E} \left( \sum_t \ln p(o_{1:T}, r_{1:T} | \mathbf{s}_{1:T}, a_{1:T}) \right) - \text{KL} \left( p(o_{1:T}, r_{1:T} | \mathbf{s}_{1:T}, a_{1:T}) \parallel \prod_t p_\theta(o_t | s_t) p_\theta(r_t | s_t^r) \right) \\ &= \mathbb{E} \left( \sum_t \ln p_\theta(o_t | \mathbf{s}_t) + \ln p_\theta(r_t | s_t^r) \right). \end{aligned} \quad (17)$$

232 Thus, we obtain the objective function:

$$\mathcal{J}_O^t = \ln p_\theta(o_t | \mathbf{s}_t) \quad \mathcal{J}_R^t = \ln p_\theta(r_t | s_t^r) \quad (18)$$

For the second term in Equation 16, we use the non-negativity of the KL divergence to obtain an upper bound,

$$\begin{aligned}
& I(\mathbf{s}_{1:T}; i_{1:T} \mid a_{1:T}) \\
&= \mathbb{E}_{q(o_{1:T}, r_{1:T}, \mathbf{s}_{1:T}, a_{1:T}, i_{1:T})} \left( \sum_t \ln q(\mathbf{s}_t \mid \mathbf{s}_{t-1}, a_{t-1}, i_t) - \ln p(\mathbf{s}_t \mid \mathbf{s}_{t-1}, a_{t-1}) \right) \\
&= \mathbb{E} \left( \sum_t \ln q_\phi(\mathbf{s}_t \mid \mathbf{s}_{t-1}, a_{t-1}, o_t) - \ln p(\mathbf{s}_t \mid \mathbf{s}_{t-1}, a_{t-1}) \right) \\
&\leq \mathbb{E} \left( \sum_t \ln q_\phi(\mathbf{s}_t \mid \mathbf{s}_{t-1}, a_{t-1}, o_t) - \ln p_\gamma(\mathbf{s}_t \mid \mathbf{s}_{t-1}, a_{t-1}) \right) \\
&= \mathbb{E} \left( \sum_t \text{KL}(q_\phi(\mathbf{s}_t \mid \mathbf{s}_{t-1}, a_{t-1}, o_t) \parallel p_\gamma(\mathbf{s}_t \mid \mathbf{s}_{t-1}, a_{t-1})) \right).
\end{aligned} \tag{19}$$

According to equation 15, we have  $p_\gamma = p_{\gamma_1} \cdot p_{\gamma_2} \cdot p_{\gamma_3} \cdot p_{\gamma_4}$  and  $q_\phi = q_{\phi_1} \cdot q_{\phi_2} \cdot q_{\phi_3} \cdot q_{\phi_4}$ .

$$\begin{aligned}
\text{KL}(q_\phi \parallel p_\gamma) &= \text{KL}(q_{\phi_1} \cdot q_{\phi_2} \cdot q_{\phi_3} \cdot q_{\phi_4} \parallel p_{\gamma_1} \cdot p_{\gamma_2} \cdot p_{\gamma_3} \cdot p_{\gamma_4}) \\
&= \mathbb{E}_{q_\phi} \left( \ln \frac{q_{\phi_1}}{p_{\gamma_1}} + \ln \frac{q_{\phi_2}}{p_{\gamma_2}} + \ln \frac{q_{\phi_3}}{p_{\gamma_3}} + \ln \frac{q_{\phi_4}}{p_{\gamma_4}} \right) \\
&= \text{KL}(q_{\phi_1} \parallel p_{\gamma_1}) + \text{KL}(q_{\phi_2} \parallel p_{\gamma_2}) + \text{KL}(q_{\phi_3} \parallel p_{\gamma_3}) + \text{KL}(q_{\phi_4} \parallel p_{\gamma_4})
\end{aligned} \tag{20}$$

We introduce additional hyperparameters to regulate the amount of information contained within each category of variables:

$$\mathcal{J}_D^t = -\beta_1 \text{KL}(q_{\phi_1} \parallel p_{\gamma_1}) - \beta_2 \text{KL}(q_{\phi_2} \parallel p_{\gamma_2}) - \beta_3 \text{KL}(q_{\phi_3} \parallel p_{\gamma_3}) - \beta_4 \text{KL}(q_{\phi_4} \parallel p_{\gamma_4}). \tag{21}$$

Additionally, we introduce two supplementary objectives to explicitly capture the distinctive characteristics of the four distinct representation categories. Specifically, we characterize the reward-relevant representations by measuring the dependence between  $s_t^r$  and  $R_t$ , given  $a_{t-1}$  and  $s_{t-1}^r$ , that is  $I(s_t^r, R_t \mid a_{t-1}, s_{t-1}^r)$  (see Figure 7(a)). Note that if there exists a directed edge from  $s_t^r$  to  $a_t$  in the graphical model,  $a_t$  should also be conditioned). To ensure that  $s_t^r$  are minimally sufficient for policy training, we maximize  $I(s_t^r, R_t \mid a_{t-1}, s_{t-1}^r)$  while minimizing  $I(s_t^r, R_t \mid a_{t-1}, s_{t-1}^r)$  to discourage the inclusion of redundant information in  $s_t^r$  concerning the rewards:

$$I(s_t^r; R_t \mid a_{t-1}, s_{t-1}^r) - I(s_t^{\bar{r}}; R_t \mid a_{t-1}, s_{t-1}^r). \tag{22}$$

The conditional mutual information can be expressed as the disparity between two mutual information values.

$$\begin{aligned}
I(s_t^r; R_t \mid a_{t-1}, s_{t-1}^r) &= I(R_t; s_t^r, a_{t-1}, s_{t-1}^r) - I(R_t; a_{t-1}, s_{t-1}^r), \\
I(s_t^{\bar{r}}; R_t \mid a_{t-1}, s_{t-1}^r) &= I(R_t; s_t^{\bar{r}}, a_{t-1}, s_{t-1}^r) - I(R_t; a_{t-1}, s_{t-1}^r).
\end{aligned} \tag{23}$$

Combining the above two equations, we eliminated the identical terms, ultimately yielding the following formula

$$I(R_t; s_t^r, a_{t-1}, s_{t-1}^r) - I(R_t; s_t^{\bar{r}}, a_{t-1}, s_{t-1}^r). \tag{24}$$

We use the Donsker-Varadhan representation to express mutual information as a supremum over functions,

$$\begin{aligned}
I(X; Y) &= D_{KL}(p(x, y) \parallel p(x)p(y)) \\
&= \sup_{T \in \mathcal{T}} \mathbb{E}_{p(x, y)}[T(x, y)] - \log \mathbb{E}_{p(x)p(y)}[e^{T(x, y)}].
\end{aligned} \tag{25}$$

We employ mutual information neural estimation [10] to approximate the mutual information value. We represent the function  $T$  using a neural network that accepts variables  $(x, y)$  as inputs and is parameterized by  $\alpha$ . The neural network is optimized through stochastic gradient ascent to find the supremum. Substituting  $x$  and  $y$  with variables defined in Equation 24, our objective is reformulated as follows:

$$\mathcal{J}_{\text{RS}}^t = \lambda_1 \cdot \{I_{\alpha_1}(R_t; s_t^r, a_{t-1}, \mathbf{sg}(s_{t-1}^r)) - I_{\alpha_2}(R_t; s_t^{\bar{r}}, a_{t-1}, \mathbf{sg}(s_{t-1}^r))\}. \tag{26}$$



256 To incorporate the conditions from the original objective, we apply the stop\_gradient operation to  
 257 the variable  $s_{t-1}^r$ . Similarly, to ensure that the representations  $s_t^a$  are directly controllable by actions,  
 258 while  $s_t^{\bar{a}}$  are not, we maximize the following objective:

$$I(s_t^a; a_{t-1} | \mathbf{s}_{t-1}) - I(s_t^{\bar{a}}, a_{t-1} | \mathbf{s}_{t-1}), \quad (27)$$

259 By splitting the conditional mutual information and eliminating identical terms, we obtain the  
 260 following objective function:

$$\mathcal{J}_{AS}^t = \lambda_2 \cdot \{I_{\alpha_3}(a_{t-1}; s_t^a, \mathbf{sg}(\mathbf{s}_{t-1})) - I_{\alpha_4}(a_{t-1}; s_t^{\bar{a}}, \mathbf{sg}(\mathbf{s}_{t-1}))\}. \quad (28)$$

261 where  $\alpha_1, \alpha_2, \alpha_3, \alpha_4$  can be obtained by maximizing Equation 25. Intuitively, these two objective  
 262 functions ensure that  $s_t^r$  is predictive of the reward, while  $s_t^{\bar{r}}$  is not; similarly,  $s_t^a$  can be predicted by  
 263 the action, whereas  $s_t^{\bar{a}}$  cannot.

264 Combine the equation 18, equation 21, equation 26 and equation 28, the total objective function is:

$$\begin{aligned} \mathcal{J}_{TOTAL} &= \max_{\phi, \theta, \gamma, \alpha_1, \alpha_3} \min_{\alpha_2, \alpha_4} \mathbb{E}_{q_\phi} \left( \sum_t (\mathcal{J}_O^t + \mathcal{J}_R^t + \mathcal{J}_D^t + \mathcal{J}_{RS}^t + \mathcal{J}_{AS}^t) \right) + \text{const} \\ &= \max_{\phi, \theta, \gamma, \alpha_1, \alpha_3} \min_{\alpha_2, \alpha_4} \mathbb{E}_{q_\phi} \{ \log p_\theta(o_t | \mathbf{s}_t) + \log p_\theta(r_t | s_t^r) \\ &\quad - \sum_{i=1}^4 \beta_i \cdot \text{KL}(q_{\phi_i} \| p_{\gamma_i}) + \lambda_1 \cdot (I_{\alpha_1} - I_{\alpha_2}) + \lambda_2 \cdot (I_{\alpha_3} - I_{\alpha_4}) \} + \text{const}. \end{aligned} \quad (29)$$

265 The expectation is computed over the dataset and the representation model. Throughout the model  
 266 learning process, the objectives for estimating mutual information and learning the world model are  
 267 alternately optimized.

## 268 S2.1 Discussions

269 In this subsection, we examine the mutual information constraints in equation 26 and equation 28 and  
 270 their relationship with other objectives. Our findings reveal that while other objectives partially fulfill  
 271 the desired functionality of the mutual information constraints, incorporating both mutual information  
 272 objectives is essential for certain environments.

273 The objective functions can be summarized as follows::

$$\begin{aligned} \mathcal{J}_O^t &= \ln p_\theta(o_t | \mathbf{s}_t), \quad \mathcal{J}_R^t = \ln p_\theta(r_t | s_t^r), \quad \mathcal{J}_D^t = -\text{KL}(q_\phi \| p_\gamma), \\ \mathcal{J}_{RS}^t &= \lambda_1 \cdot \{I_{\alpha_1}(R_t; s_t^r, a_{t-1}, \mathbf{sg}(s_{t-1}^r)) - I_{\alpha_2}(R_t; s_t^{\bar{r}}, a_{t-1}, \mathbf{sg}(s_{t-1}^{\bar{r}}))\}, \\ \mathcal{J}_{AS}^t &= \lambda_2 \cdot \{I_{\alpha_3}(a_{t-1}; s_t^a, \mathbf{sg}(\mathbf{s}_{t-1})) - I_{\alpha_4}(a_{t-1}; s_t^{\bar{a}}, \mathbf{sg}(\mathbf{s}_{t-1}))\}, \end{aligned} \quad (30)$$

274 and the KL divergence term can be further decomposed into 4 components:

$$\begin{aligned} \mathcal{J}_{D_1}^t &= -\beta_1 \cdot \text{KL}(q_{\phi_1}(s_t^{ar} | o_t, s_{t-1}^r, a_{t-1}) \| p_{\gamma_1}(s_t^{ar} | s_{t-1}^r, a_{t-1})) \\ \mathcal{J}_{D_2}^t &= -\beta_2 \cdot \text{KL}(q_{\phi_2}(s_t^{\bar{ar}} | o_t, s_{t-1}^r) \| p_{\gamma_2}(s_t^{\bar{ar}} | s_{t-1}^r)) \\ \mathcal{J}_{D_3}^t &= -\beta_3 \cdot \text{KL}(q_{\phi_3}(s_t^{a\bar{r}} | o_t, \mathbf{s}_{t-1}, a_{t-1}) \| p_{\gamma_3}(s_t^{a\bar{r}} | \mathbf{s}_{t-1}, a_{t-1})) \\ \mathcal{J}_{D_4}^t &= -\beta_4 \cdot \text{KL}(q_{\phi_4}(s_t^{\bar{a}\bar{r}} | o_t, \mathbf{s}_{t-1}) \| p_{\gamma_4}(s_t^{\bar{a}\bar{r}} | \mathbf{s}_{t-1})). \end{aligned} \quad (31)$$

275 Specifically, maximizing  $I_{\alpha_1}$  in  $\mathcal{J}_{RS}^t$  enhances the predictability of  $R_t$  based on the current state  $s_{t-1}^r$   
 276 conditioning on  $(s_{t-1}^r, a_{t-1})$ . However, notice that this objective can be partially accomplished by  
 277 optimizing  $\mathcal{J}_R^t$ . When learning the world model, both the transition function and the reward function  
 278 are trained: the reward function predicts the current reward  $r_t$  using  $s_t^r$ , while the transition model  
 279 predicts the next state. These combined predictions contribute to the overall prediction of  $R_t$ .

280 Minimizing  $I_{\alpha_2}$  in  $\mathcal{J}_{RS}^t$  eliminates extraneous reward-related information present in  $s_t^{\bar{r}}$ . According to  
 281 our formulation,  $s_t^{\bar{r}}$  can still be predictive of  $R_t$  as long as it does not introduce additional predictability

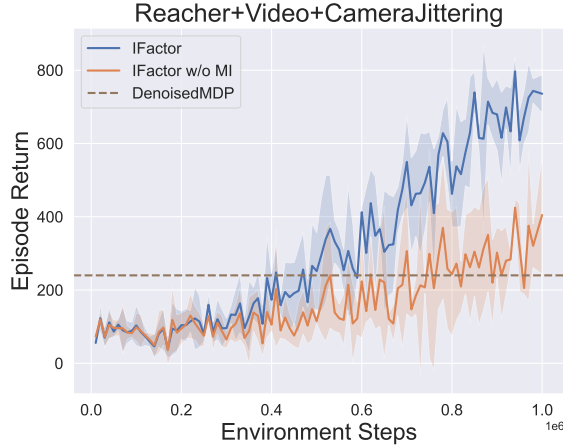

Figure 1: Ablation of the mutual information constraints in the Reacher environment with video background and jittering camera. The dashed brown line illustrates the policy performance of Denoised MDP after 1 million environment steps.

beyond what is already captured by  $(s_{t-1}^r, a_{t-1})$ . This is because we only assume that  $s_t^{\bar{r}}$  is **conditionally** independent from  $R_t$  when conditioning on  $s_{t-1}^r$ . If we don't condition on  $s_{t-1}^r$ , it introduces  $s_{t-1}^r$  as the confounding factor between  $s_t^{\bar{r}}$  and  $R_t$ , establishing association between  $s_t^{\bar{r}}$  and  $R_t$  (refer to Figure 7(a)). Note that the KL divergence constraints govern the information amount within each state category. By amplifying the weight of the KL constraints on  $s_t^{\bar{r}}$ , the value of  $I_{\alpha_2}$  can indirectly be diminished.

By maximizing  $I_{\alpha_3}$  and minimizing  $I_{\alpha_4}$  in  $\mathcal{J}_{AS}^t$ , we ensure that  $s_t^a$  can be predicted based on  $(a_{t-1}, \mathbf{s}_{t-1})$  while  $s_t^{\bar{a}}$  cannot. The KL constraints on  $s_t^{ar}$  and  $s_t^{a\bar{r}}$  incorporate the action  $a_{t-1}$  into the prior and posterior, implicitly requiring that  $s_t^a$  should be predictable given  $a_{t-1}$ . Conversely, the KL constraints on  $s_t^{\bar{a}r}$  and  $s_t^{\bar{a}\bar{r}}$  do not include the action  $a_{t-1}$  in the prior and posterior, implicitly requiring that  $s_t^a$  should not be predictable based on  $a_{t-1}$ . However, relying solely on indirect constraints can sometimes be ineffective, as it may lead to entangled representations that negatively impact policy performance (see Figure 5).

**Ablation of the mutual information constraints.** The inclusion of both  $\mathcal{J}_{RS}^t$  and  $\mathcal{J}_{AS}^t$  is essential in certain environments to promote disentanglement and enhance policy performance, despite sharing some common objectives. We have observed improved training stability in the variant of Robodesk environment (see Figure 4) and significant performance gains in the Reacher environment with video background and camera jittering (see Figure 1). When two mutual information objectives are removed, we notice that entangled representations emerged in these environments, as depicted in Figure 5. We assign values of 0.1 to  $\lambda_1$  and  $\lambda_2$  in the environment of modified Cartpole, variant of Robodesk and Reacher with video background and jittering camera. Empirically, a value of 0.1 has been found to be preferable for both  $\lambda_1$  and  $\lambda_2$ . Using a higher value for regularization might negatively impact the learning of representation and transition model. In other DMC environments, the ELBO loss alone has proven effective due to the inherent structure of our disentangled latent dynamics. The choice of hyperparameters  $(\beta_1, \beta_2, \beta_3, \beta_4)$  depends on the specific goals of representation learning and the extent of noise interference in the task. If the objective is to accurately recover the true latent variables for understanding the environment, it is often effective to assign equal weights to the four KL divergence terms (for experiments on synthetic data and modified cartpole). When the aim is to enhance policy training stability by mitigating noise, it is recommended to set the values of  $\beta_1$  and  $\beta_2$  higher than  $\beta_3$  and  $\beta_4$  (for experiments on variants of Robodesk and DMC). Moreover, in environments with higher levels of noise, it is advisable to increase the discrepancy in values between the hyperparameters.

### S3 Environment descriptions

#### S3.1 Synthetic data

For the sake of simplicity, we consider one lag for the latent processes in Section 4. Our identifiability proof can actually be applied for arbitrary lags directly because the identifiability does not rely on the number of previous states. We extend the latent dynamics of the synthetic environment to incorporate a general time-delayed causal effect with  $\tau \geq 1$  in the synthetic environment. When  $\tau = 1$ , it reduces to a common MDP. The ground-truth generative model of the environment is as follows::

$$\left\{ \begin{array}{ll} \text{Observation Model:} & p_{\theta}(o_t | \mathbf{s}_t) \\ \text{Reward Model:} & p_{\theta}(r_t | s_t^r) \\ \text{Transition Model:} & p_{\gamma}(\mathbf{s}_t | \mathbf{s}_{t-\tau:t-1}, a_{t-\tau:t-1}) \end{array} \right. \quad \text{Transition : } \left\{ \begin{array}{l} p_{\gamma_1}(s_t^{ar} | s_{t-\tau:t-1}^r, a_{t-\tau:t-1}) \\ p_{\gamma_2}(s_t^{\bar{ar}} | s_{t-\tau:t-1}^r) \\ p_{\gamma_3}(s_t^{\bar{ar}} | \mathbf{s}_{t-\tau:t-1}, a_{t-\tau:t-1}) \\ p_{\gamma_4}(s_t^{\bar{ar}} | \mathbf{s}_{t-\tau:t-1}) \end{array} \right. \quad (32)$$

**Data Generation** We generate synthetic datasets with 100, 000 data points according to the generating process in Equation 32, which satisfies the identifiability conditions stated in Theorem 1. The latent variables  $\mathbf{s}_t$  have 8 dimensions, where  $s_t^{ar} = s_t^{\bar{ar}} = s_t^{\bar{ar}} = s_t^{\bar{ar}} = 2$ . At each timestep, a one-hot action of dimension 5, denoted as  $a_t$ , is taken. The lag number of the process is set to  $\tau = 2$ . The observation model  $p_{\theta}(o_t | \mathbf{s}_t)$  is implemented using a random three-layer MLPs with LeakyReLU units. The reward model  $p_{\theta}(r_t | s_t^r)$  is represented by a random one-layer MLP. It's worth noting that the reward model is not invertible due to the scalar nature of  $r_t$ . Four distinct transition functions, namely  $p_{\gamma_1}$ ,  $p_{\gamma_2}$ ,  $p_{\gamma_3}$ , and  $p_{\gamma_4}$ , are employed and modeled using random one-layer MLP with LeakyReLU units. The process noise is sampled from an i.i.d. Gaussian distribution with a standard deviation of  $\sigma = 0.1$ . To simulate nonstationary noise for various latent variables in RL, the process noise terms are coupled with the historical information by multiplying them with the average value of all the time-lagged latent variables, as suggested in [11].

#### S3.2 Modified Cartpole

We have modified the original Cartpole environment by introducing two distractors. The first distractor is an uncontrollable Cartpole located in the upper portion of the image, which does not affect the rewards. The second distractor is a controllable green light positioned below the reward-relevant Cartpole in the lower part of the image, but it is not associated with any rewards. The task-irrelevant cartpole undergoes random actions at each time step and stops moving when its angle exceeds 45 degrees or goes beyond the screen boundaries. The action space consists of three independent degrees of freedom: direction (left or right), force magnitude (10N or 20N), and green light intensity (lighter or darker). This results in an 8-dimensional one-hot vector. The objective of this variant is to maintain balance for the reward-relevant cartpole by applying suitable forces.

#### S3.3 Variant of Robodesk

The RoboDesk environment with noise distractors [12] is a control task designed to simulate realistic sources of noise, such as flickering lights and shaky cameras. Within the environment, there is a large TV that displays natural RGB videos. On the desk, there is a green button that controls both the hue of the TV and a light. The agent's objective is to manipulate this button in order to change the TV's

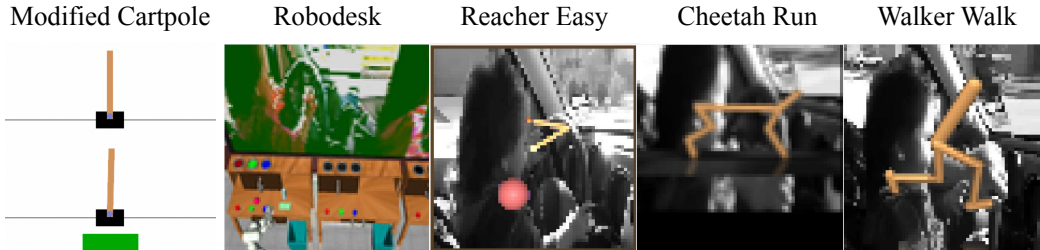

Figure 2: Visualization of the environments used in our experiments.

|                   | Ctrl + Rew                             | $\overline{\text{Ctrl}} + \text{Rew}$ | Ctrl + $\overline{\text{Rew}}$                                                          | $\overline{\text{Ctrl}} + \overline{\text{Rew}}$                            |
|-------------------|----------------------------------------|---------------------------------------|-----------------------------------------------------------------------------------------|-----------------------------------------------------------------------------|
| Modified Cartpole | Agent                                  | Agent                                 | Green Light                                                                             | Distractor cartpole                                                         |
| Robodesk          | Agent, Button,<br>Light on desk        | TV content,<br>Button sensor noise    | Blocks on desk,<br>Handle on desk,<br>Other movable objects<br><b>(Green hue of TV)</b> | Jittering and<br>flickering<br>environment<br>lighting,<br>Jittering camera |
| DMC               | Noiseless                              | Agent                                 | <b>(Agent)</b>                                                                          | —                                                                           |
|                   | Video Background                       | Agent                                 | <b>(Agent)</b>                                                                          | Background                                                                  |
|                   | Video Background<br>+ Noisy Sensor     | Agent                                 | <b>(Agent)</b><br>Background                                                            | —                                                                           |
|                   | Video Background<br>+ Camera Jittering | Agent                                 | <b>(Agent)</b>                                                                          | Background<br>Jittering camera                                              |

Table 1: Categorization of various types of information in the environments we evaluated. We use the red color to emphasize the categorization difference between IFactor and Denoised MDP. Unlike Denoised MDP that assumes independent latent processes, IFactor allows for causally-related processes. Therefore, in this paper, the term "controllable" refers specifically to one-step controllability, while "reward-relevant" is characterized by the conditional dependence between  $s_t^*$  and the cumulative reward variable  $R_t$  when conditioning on  $(s_{t-1}, a_{t-1})$ . Following this categorization, certain agent information can be classified as (one-step) uncontrollable (including indirectly controllable and uncontrollable factors) but reward-relevant factors, such as some position information determined by the position and velocity in the previous time-step rather than the action. On the other hand, the green hue of TV in Robodesk is classified as controllable but reward-irrelevant factors, as they are independent of the reward given the state of the robot arm and green button, aligning with the definition of  $s_t^{a\bar{r}}$ .

349 hue to green. The agent’s reward is determined based on the greenness of the TV image. In this  
350 environment, all four types of information are present (see Table 1).

### 351 S3.4 Variants of DeepMind Control Suite

352 Four variants [12] are introduced for each DMC task:

- 353 • **Noiseless:** Original environment without distractors.
- 354 • **Video Background:** Replacing noiseless background with natural videos [13] ( $\overline{\text{Ctrl}} + \overline{\text{Rew}}$ ).
- 355 • **Video Background + Sensor Noise:** Imperfect sensors sensitive to intensity of a background  
356 patch ( $\text{Ctrl} + \text{Rew}$ ).
- 357 • **Video Background + Camera Jittering:** Shifting the observation by a smooth random  
358 walk ( $\overline{\text{Ctrl}} + \overline{\text{Rew}}$ ).

359 The video background in the environment incorporates grayscale videos from Kinetics-400, where  
360 pixels with high blue channel values are replaced. Camera jittering is introduced through a smooth  
361 random walk shift using Gaussian-perturbing acceleration, velocity decay, and pulling force. Sensor  
362 noise is added by perturbing a specific sensor based on the intensity of a patch in the background video.  
363 The perturbation involves adding the average patch value minus 0.5. Different sensors are perturbed  
364 for different environments. These sensor values undergo non-linear transformations, primarily piece-  
365 wise linear, to compute rewards. While the additive reward noise model may not capture sensor  
366 behavior perfectly, it is generally sufficient as long as the values remain within moderate ranges and  
367 stay within one linear region. (Note: the variants of Robodesk and DMC are not the contributions  
368 of this paper. We kindly refer readers to the paper of Denoised MDP [12] for a more detailed  
369 introduction.)

## S4 Experimental Details

**Computing Hardware** We used a machine with the following CPU specifications: Intel(R) Xeon(R) Silver 4110 CPU @ 2.10GHz; 32 CPUs, eight physical cores per CPU, a total of 256 logical CPU units. The machine has two GeForce RTX 2080 Ti GPUs with 11GB GPU memory.

**Reproducibility** We’ve included the code for the framework and all experiments in the supplement. We plan to release our code under the MIT License after the paper review period.

### S4.1 Synthetic Dataset

**Hyperparameter Selection and Network Structure** We adopt a similar experimental setup to TDRL [11], while extending it by decomposing the dynamics into four causally related latent processes proposed in this paper (refer to Equation 32). For all experiments, we assign  $\beta_1 = \beta_2 = \beta_3 = \beta_4 = 0.003$  as the weights for the KL divergence terms. In this particular experiment, we set  $\lambda_1$  and  $\lambda_2$  to 0 because the utilization of the ELBO loss alone has effectively maximized  $J'_{RS}$  and  $J'_{AS}$ , as illustrated in Figure 3. Here,  $J'_{RS}$  represents  $I_{\alpha_1} - I_{\alpha_2}$ , and  $J'_{AS}$  represents  $I_{\alpha_3} - I_{\alpha_4}$ . The network structure employed in this experiment is presented in Table 2.

**Training Details** The models are implemented in PyTorch 1.13.1. The VAE network is trained using AdamW optimizer for 100 epochs. A learning rate of 0.001 and a mini-batch size of 64 are used. We have used three random seeds in each experiment and reported the mean performance with standard deviation averaged across random seeds.

Table 2: Architecture details. BS: batch size, T: length of time series, o\_dim: observation dimension, s\_dim: latent dimension,  $s_t^{ar}$ \_dim: latent dimension for  $s_t^{ar}$ ,  $s_t^{\bar{ar}}$ \_dim: latent dimension for  $s_t^{\bar{ar}}$ ,  $s_t^{ar}$ \_dim: latent dimension for  $s_t^{ar}$ ,  $s_t^{\bar{ar}}$ \_dim: latent dimension for  $s_t^{\bar{ar}}$  ( $s\_dim = s_t^{ar\_dim} + s_t^{\bar{ar}}\_dim + s_t^{ar\_dim} + s_t^{\bar{ar}}\_dim$ ), LeakyReLU: Leaky Rectified Linear Unit.

| Configuration                                                                                          | Description                                        | Output                                          |
|--------------------------------------------------------------------------------------------------------|----------------------------------------------------|-------------------------------------------------|
| <b>1. MLP-Obs-Encoder</b> Observation Encoder for Synthetic Data                                       |                                                    |                                                 |
| Input: $o_{1:T}$                                                                                       | Observed time series                               | $BS \times T \times o\_dim$                     |
| Dense                                                                                                  | 128 neurons, LeakyReLU                             | $BS \times T \times 128$                        |
| Dense                                                                                                  | 128 neurons, LeakyReLU                             | $BS \times T \times 128$                        |
| Dense                                                                                                  | 128 neurons, LeakyReLU                             | $BS \times T \times 128$                        |
| Dense                                                                                                  | Temporal embeddings                                | $BS \times T \times s\_dim$                     |
| <b>2. MLP-Obs-Decoder</b> Observation Decoder for Synthetic Data                                       |                                                    |                                                 |
| Input: $\hat{s}_{1:T}$                                                                                 | Sampled latent variables                           | $BS \times T \times s\_dim$                     |
| Dense                                                                                                  | 128 neurons, LeakyReLU                             | $BS \times T \times 128$                        |
| Dense                                                                                                  | 128 neurons, LeakyReLU                             | $BS \times T \times 128$                        |
| Dense                                                                                                  | o_dim neurons, reconstructed $\hat{o}_{1:T}$       | $BS \times T \times o\_dim$                     |
| <b>3. MLP-Reward-Decoder</b> Reward Decoder for Synthetic Data                                         |                                                    |                                                 |
| Input: $\hat{s}_{1:T}$                                                                                 | Sampled latent variables                           | $BS \times T \times s\_dim$                     |
| Dense                                                                                                  | 1 neurons, LeakyReLU                               | $BS \times T \times 1$                          |
| <b>4. Disentangled Prior for <math>s_t^{ar}</math></b> Nonlinear Transition Prior Network              |                                                    |                                                 |
| Input                                                                                                  | Sampled latents and actions $s_{1:T}^r, a_{1:T}$   | $BS \times T \times (s_t^r\_dim + a\_dim)$      |
| Dense                                                                                                  | $s_t^{ar}$ _dim neurons, prior output              | $BS \times T \times s_t^{ar\_dim}$              |
| <b>5. Disentangled Prior for <math>s_t^{\bar{ar}}</math></b> Nonlinear Transition Prior Network        |                                                    |                                                 |
| Input                                                                                                  | Sampled latent variable sequence $s_{1:T}^r$       | $BS \times T \times s_t^r\_dim$                 |
| Dense                                                                                                  | $s_t^{\bar{ar}}$ _dim neurons, prior output        | $BS \times T \times s_t^{\bar{ar}}\_dim$        |
| <b>6. Disentangled Prior for <math>s_t^{ar\bar{r}}</math></b> Nonlinear Transition Prior Network       |                                                    |                                                 |
| Input                                                                                                  | Sampled latents and actions $s_{1:T}, a_{1:T}$     | $BS \times T \times (s\_dim + a\_dim)$          |
| Dense                                                                                                  | $s_t^{ar\bar{r}}$ _dim neurons, prior output       | $BS \times T \times s_t^{ar\bar{r}}\_dim$       |
| <b>7. Disentangled Prior for <math>s_t^{\bar{ar}\bar{r}}</math></b> Nonlinear Transition Prior Network |                                                    |                                                 |
| Input                                                                                                  | Sampled latent variable sequence $s_{1:T}$         | $BS \times T \times s\_dim$                     |
| Dense                                                                                                  | $s_t^{\bar{ar}\bar{r}}$ _dim neurons, prior output | $BS \times T \times s_t^{\bar{ar}\bar{r}}\_dim$ |

### 388 S4.1.1 Extra Results.

389 During the training process, we record the estimation value of four mutual information (MI) terms.  
 390 The corresponding results are presented in Figure 3. Despite not being explicitly incorporated into  
 391 the objective function, the terms  $I_{\alpha_1} - I_{\alpha_2}$  and  $I_{\alpha_3} - I_{\alpha_4}$  exhibit significant maximization. Furthermore,  
 392 the estimation values of  $I_{\alpha_2}$  and  $I_{\alpha_4}$  are found to be close to 0. These findings indicate that the state  
 393 variable  $s_t^T$  contains little information about the reward, and the predictability of  $s_t^T$  by the action is  
 also low.

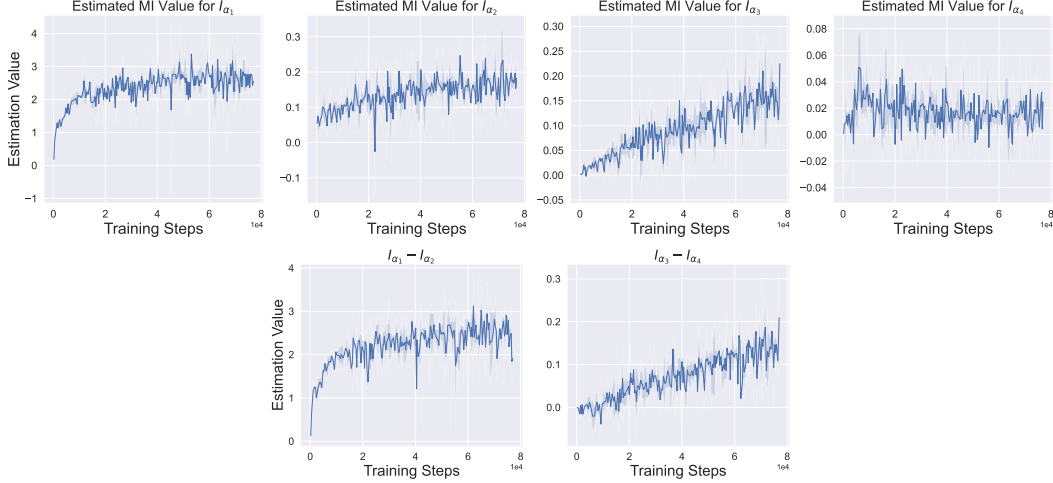

Figure 3: Estimation of the value of four mutual information terms and their differences in experiments on synthetic data.

### 395 S4.2 Modified Cartpole

396 In the modified Cartpole environment, we configure the values as follows:  $\beta_1 = \beta_2 = \beta_3 = \beta_4 = 0.1$   
 397 and  $\lambda_1 = \lambda_2 = 0.1$ . Recurrent State Space Model (RSSM) uses a deterministic part and a stochastic  
 398 part to represent latent variables. The deterministic state size for four dynamics are set to be (15, 15,  
 399 15, 15), and the stochastic state size are set to be (2, 2, 1, 4). The architecture of the encoder and  
 400 decoder for observation is shown in Table 3 and Table 4 ( $64 \times 64$  resolution). Reward model uses  
 401 3-layer MLPs with hidden size to be 100 and four mutual information neural estimators are 4-layer  
 402 MLPs with hidden size to be 128.

### 403 S4.3 Variant of Robodesk

404 In the variant of Robodesk, we conduct experiments with the following hyperparameter settings:  
 405  $\beta_1 = \beta_2 = 2, \beta_3 = \beta_4 = 0.25$ , and  $\lambda_1 = \lambda_2 = 0.1$ . For the four dynamics, we set the deterministic  
 406 state sizes to (120, 40, 40, 40), and the stochastic state sizes to (30, 10, 10, 10). Denoised MDP  
 407 utilizes two latent processes with deterministic state sizes [120, 120] and stochastic state sizes [20,  
 408 10]. For the mutual information neural estimators, we employ 4-layer MLPs with a hidden size of  
 409 128. To ensure a fair comparison, we align the remaining hyperparameters and network structure  
 410 with those in the Denoised MDP. We reproduce the results of the Denoised MDP using their released  
 411 code, maintaining consistency with their paper by employing the default hyperparameters. In order to  
 412 evaluate the impact of the Mutual Information (MI) constraints, we conduct an ablation study. The  
 413 results are shown in Figure 4. The constraints  $\mathcal{J}_{RS}^t$  and  $\mathcal{J}_{AS}^t$  are observed to stabilize the training  
 414 process of IFactor. The results of IFactor are averaged over 5 runs, while the results of Denoised  
 415 MDP and IFactor without MI are averaged over three runs.

416 **Policy learning based on the learned representations by IFactor** We retrain policies using the  
 417 Soft Actor-Critic algorithm [14] with various combinations of the four learned latent categories  
 418 as input. We wrap the original environment with visual output using our representation model to  
 419 obtain compact features. In this process, both deterministic states and stochastic states are utilized

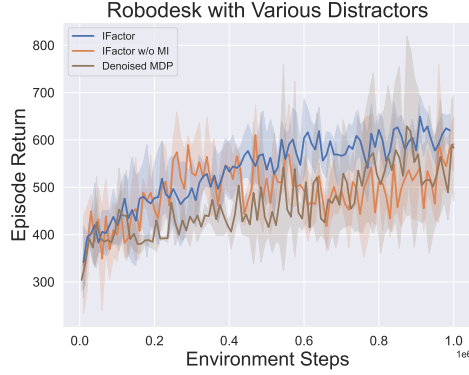

Figure 4: Comparison between IFactor and Denoised MDP in the variant of Robodesk environment.

to form the feature. For instance, when referring to  $s_t^r$ , we use both the deterministic states and stochastic states of  $s_t^r$ . The implementation of SAC algorithm is based on Stable-Baselines3[15], with a learning rate of 0.0002. Both the policy network and Q network consist of 4-layer MLPs with a hidden size of 256. We use the default hyperparameter settings in Stable-Baselines3 for other parameters.

#### S4.4 Variants of Deep Mind Control Suite

In the noiseless DMC environments, we set  $\beta_1 = \beta_2 = \beta_3 = \beta_4 = 1$ . For the DMC environments with video background, we set  $\beta_1 = \beta_2 = 1$  and  $\beta_3 = \beta_4 = 0.25$ . In the DMC environments with video background and noisy sensor, we set  $\beta_1 = \beta_2 = 2$  and  $\beta_3 = \beta_4 = 0.25$ . Lastly, for the DMC environments with video background and jittering camera, we set  $\beta_1 = \beta_2 = 1$  and  $\beta_3 = \beta_4 = 0.25$ . Regarding the Reacher environment with video background and jittering camera, we set  $\lambda_1 = \lambda_2 = 0.1$  for our experiments. For the other environments, we set  $\lambda_1 = \lambda_2 = 0$ . The deterministic state sizes for the four dynamics are set to (120, 120, 60, 60), while the stochastic state sizes are set to (20, 20, 10, 10). The four mutual information neural estimators utilize a 4-layer MLPs with a hidden size of 128. We align the other hyperparameters and network structure with those used in the Denoised MDP for a fair comparison.

| Operator       | Input Shape   | Kernel Size | Stride | Padding |
|----------------|---------------|-------------|--------|---------|
| Input          | [3, 96, 96]   | —           | —      | —       |
| Conv. + ReLU   | [32, 47, 47]  | 4           | 2      | 0       |
| Conv. + ReLU   | [64, 22, 22]  | 4           | 2      | 0       |
| Conv. + ReLU   | [128, 10, 10] | 4           | 2      | 0       |
| Conv. + ReLU   | [256, 4, 4]   | 4           | 2      | 0       |
| Conv. + ReLU * | [256, 2, 2]   | 3           | 1      | 0       |
| Reshape + FC   | [1024]        | —           | —      | —       |

Table 3: The encoder architecture designed for observation resolution of  $(96 \times 96)$ . Its output is then fed into other networks for posterior inference. The default activation function used in the network is RELU. For observations with a resolution of  $(64 \times 64)$ , the last convolutional layer(\*) is removed.

##### S4.4.1 Extra Results.

Figure 1 demonstrates the notable improvement in policy performance in the Reacher environment with video background and jittering camera due to the inclusion of the constraints  $J_{RS}^t$  and  $J_{AS}^t$ . To

| Operator                 | Input Shape  | Kernel Size | Stride | Padding |
|--------------------------|--------------|-------------|--------|---------|
| Input                    | [input_size] | —           | —      | —       |
| FC + ReLU + Reshape      | [1024, 1, 1] | —           | —      | —       |
| Conv. Transpose + ReLU * | [128, 3, 3]  | 3           | 1      | 0       |
| Conv. Transpose + ReLU   | [128, 9, 9]  | 5           | 2      | 0       |
| Conv. Transpose + ReLU   | [64, 21, 21] | 5           | 2      | 0       |
| Conv. Transpose + ReLU   | [32, 46, 46] | 6           | 2      | 0       |
| Conv. Transpose + ReLU   | [3, 96, 96]  | 6           | 2      | 0       |

Table 4: The decoder architecture designed for  $(96 \times 96)$ -resolution observation. For  $(64 \times 64)$ -resolution observation, the first transpose convolutional layer(\*) is removed.

|                   | Environment Steps | Action Repeat | Train Every | Collection Intervals | Batch Size | Sequence Length | Horizon |
|-------------------|-------------------|---------------|-------------|----------------------|------------|-----------------|---------|
| Modified Cartpole | 200,000           | 1             | 5           | 5                    | 20         | 30              | 8       |
| Robodesk          | 1,000,000         | 2             | 1000        | 100                  | 50         | 50              | 15      |
| DMC               | 1,000,000         | 2             | 1000        | 100                  | 25         | 50              | 12      |

Table 5: Some hyperparameters of our method in the environment of Modified Cartpole, Robodesk and DMC. *Environment Steps* represents the number of interactions between the agent and the environment. *Action Repeat* determines how many times an agent repeats an action in a step. *Train Every* specifies the environment step between adjacent training iterations. *Collection Intervals* defines the number of times the model is trained in each training iteration (including world models, policy networks and value networks). *Batch Size* refers to the number of trajectories in each mini-batch. *Sequence Length* denotes the length of the chunk used in training the world models. *Horizon* determines the length of dreaming when training the policy using the world model. Hyperparameters are aligned with those used in the Denoised MDP for fair comparison.

439 further investigate how they affects the model learning, we record the estimation values of four Mutual  
440 Information terms throughout the training process, as depicted in Figure 5. The results indicate that  
441 both  $I_{\alpha_1} - I_{\alpha_2}$  and  $I_{\alpha_3} - I_{\alpha_4}$  are maximized for both IFactor and IFactor without MI. However, IFactor  
442 exhibits a significantly higher rate of maximizing  $I_{\alpha_3} - I_{\alpha_4}$  compared to IFactor without MI. This  
443 increased maximization leads to greater predictability of  $s_t^a$  by the action, ultimately contributing to  
444 the observed performance gain.

#### 445 S4.5 Visualization for DMC

446 In this experiment, we investigate five types of representations, which can be derived from the  
447 combination of four original disentangled representation categories. Specifically,  $s_t^a$  is the controllable  
448 and reward relevant representation.  $s_t^r = (s_t^{ar}, s_t^{\bar{ar}})$  is the reward-relevant representation.  $s_t^{\bar{ar}}$  is the  
449 controllable but reward-irrelevant representation.  $s_t^{\bar{ar}}$  is the uncontrollable and reward-irrelevant  
450 representation (noise).  $s_t^{\bar{r}} = (s_t^{ar}, s_t^{\bar{ar}})$  is the reward-irrelevant representation. Only representations  
451 of  $s_t^r$  are used for policy optimization. We retrain 5 extra observation decoders to reconstruct the  
452 original image, which can precisely characterize what kind of information each type of representation  
453 contains, surpassing the limitations of the original decoder that is used in latent traversal. The  
454 visualization results are shown in Figure 6. It can be observed that  $s_t^{ar}$  captures the movement of  
455 the agent partially but not well enough;  $s_t^r$  captures the movement of the agent precisely but  $s_t^{\bar{r}}$   
456 fails (Reacher and Cheetah) or captures extra information of the background (Walker). This finding  
457 suggests that  $s_t^r$  contains sufficient information within the original noisy observation for effective  
458 control, while effectively excluding other sources of noise.



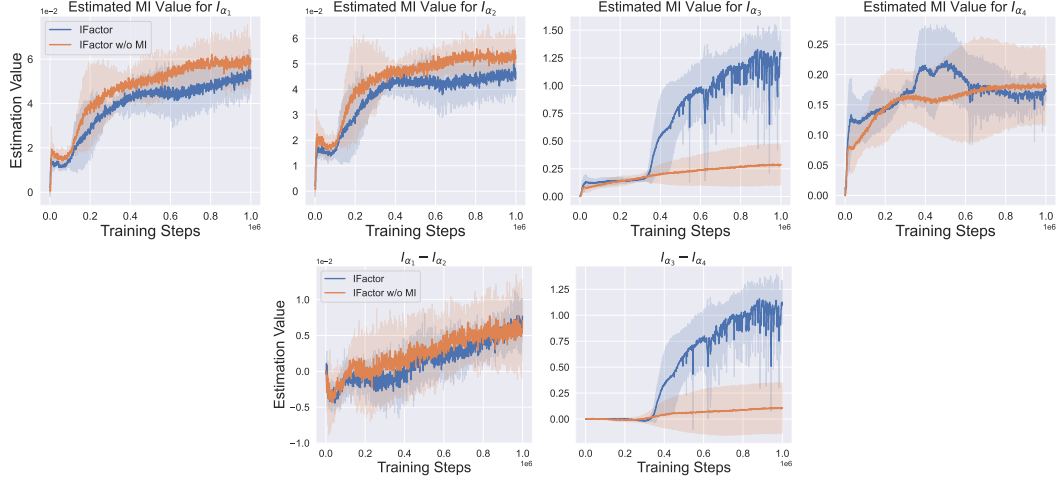

Figure 5: Estimation of the value of four mutual information terms and their differences in the Reacher Easy environment with video background and jittering camera.

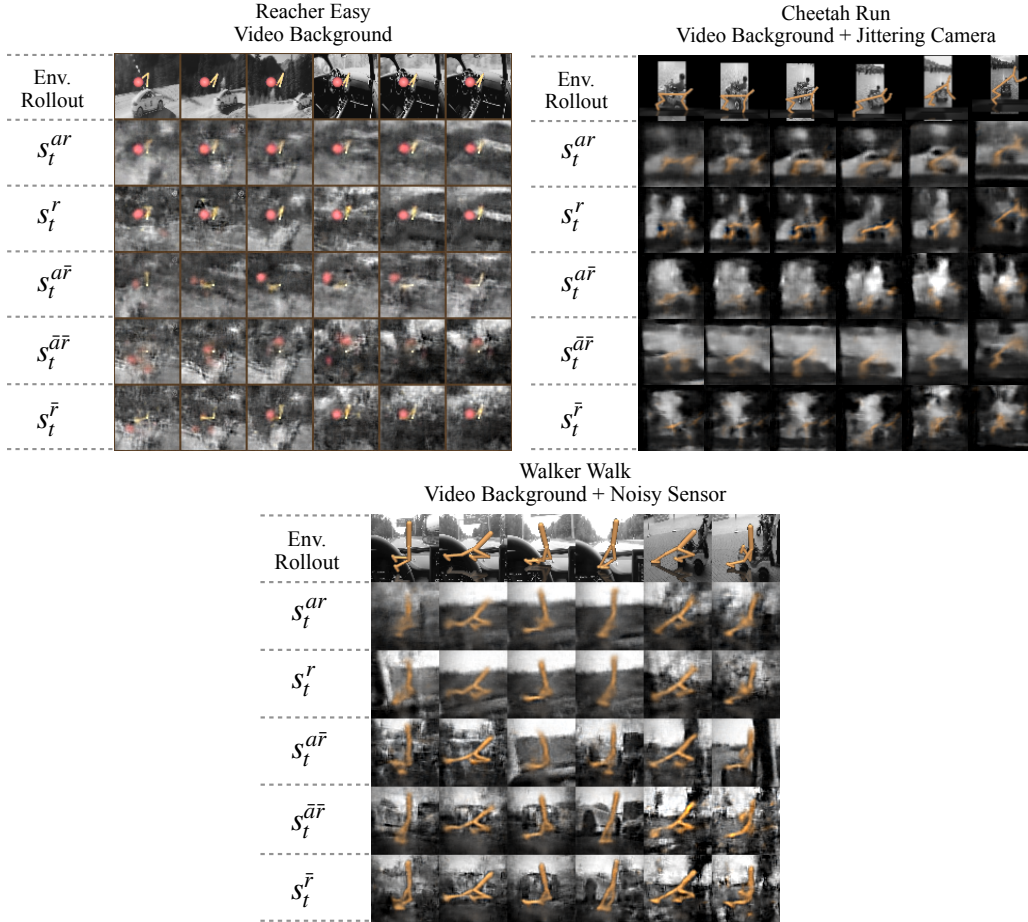

Figure 6: Visualization of the DMC variants and the factorization learned by IFactor.

## 459 S5 Comparison between IFactor and Denoised MDP

460 While both IFactor and Denoised MDP share the common aspect of factorizing latent variables  
 461 based on controllability and reward relevance, it is crucial to recognize the numerous fundamental  
 462 distinctions between them.

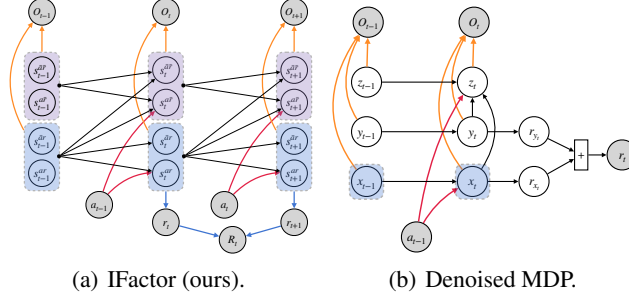

Figure 7: Graphical illustration of our world model and Denoised MDP.

463 First and foremost, Denoised MDP adopts a rather stringent assumption by solely considering three  
 464 types of latent variables and assuming independent latent processes for  $x_t$  and  $y_t$ . However, this strict  
 465 assumption may not hold in many scenarios where uncontrollable yet reward-relevant factors exhibit  
 466 dependencies on controllable and reward-relevant factors. Take, for instance, the case of car driving:  
 467 the agent lacks control over surrounding vehicles, yet their behaviors are indirectly influenced by the  
 468 agent’s actions. In contrast, our approach encompasses four types of causally related latent variables  
 469 while only assuming conditional independence when conditioning on the state in the previous time  
 470 step. This assumption holds true naturally within the MDP framework.

471 Secondly, Denoised MDP is limited to factoring out additive rewards solely for  $x_t$ , disregarding the  
 472 possibility of non-additive effects in many uncontrollable yet reward-relevant factors. In contrast, our  
 473 method embraces the inclusion of non-additive effects of  $s_t^{ar}$  on the reward, which is more general.

474 Thirdly, Denoised MDP uses only controllable and reward-relevant latent variables for policy opti-  
 475 mization, which we show in the theoretical analysis that it is generally insufficient. In contrast, our  
 476 method utilize both controllable and uncontrollable reward-relevant factors for policy training.

477 Finally, Denoised MDP makes the assumption of an intermediate causal effect from  $x_t$  to  $z_t$  and  
 478 from  $y_t$  to  $z_t$ , which is inherently unidentifiable without further intervention. It is worth noting that  
 479 imposing interventions on the latent states is unrealistic in most control tasks, as agents can only  
 480 choose actions at specific states and cannot directly intervene on the state itself. In contrast, our  
 481 method assumes that there exists no intermediate causal effect for latent variables. In conjunction with  
 482 several weak assumptions, we provide a proof of block-wise identifiability for our four categories  
 483 of latent variables. This property serves two important purposes: (1) it ensures the removal of  
 484 reward-irrelevant factors and the utilization of minimal and sufficient reward-relevant variables for  
 485 policy optimization, and (2) it provides a potential means for humans to comprehend the learned  
 486 representations within the reinforcement learning (RL) framework. Through latent traversal of the  
 487 four types of latent variables, humans can gain insights into the specific kind of information that each  
 488 category of representation contains within the image.

489 From the perspective of model structure, it is worth highlighting that the architecture of both the  
 490 transition model (prior) and the representation model (posterior) in IFactor differs from that of  
 491 Denoised MDP. The structure of prior and posterior of IFactor is shown as follows:

$$\begin{array}{ll}
 \text{Prior:} & \text{Posterior:} \\
 \left\{ \begin{array}{l} p_{\gamma_1}(s_t^{ar} | s_{t-1}^r, a_{t-1}) \\ p_{\gamma_2}(s_t^{\bar{ar}} | s_{t-1}^r) \\ p_{\gamma_3}(s_t^{ar\bar{r}} | \mathbf{s}_{t-1}, a_{t-1}) \\ p_{\gamma_4}(s_t^{\bar{ar}\bar{r}} | \mathbf{s}_{t-1}) \end{array} \right. & \left\{ \begin{array}{l} q_{\phi_1}(s_t^{ar} | o_t, s_{t-1}^r, a_{t-1}) \\ q_{\phi_2}(s_t^{\bar{ar}} | o_t, s_{t-1}^r) \\ q_{\phi_3}(s_t^{ar\bar{r}} | o_t, \mathbf{s}_{t-1}, a_{t-1}) \\ q_{\phi_4}(s_t^{\bar{ar}\bar{r}} | o_t, \mathbf{s}_{t-1}) \end{array} \right. \quad (33)
 \end{array}$$

492 While Denoised MDP has the following prior and posterior:

$$\begin{array}{cc}
\text{Prior:} & \text{Posterior:} \\
\left\{ \begin{array}{l} p_{\gamma_1}(x_t | x_{t-1}, a_{t-1}) \\ p_{\gamma_2}(y_t | y_{t-1}) \\ p_{\gamma_3}(z_t | x_t, y_t, z_{t-1}) \end{array} \right. & \left\{ \begin{array}{l} p_{\phi_1}(x_t | x_{t-1}, y_{t-1}, z_{t-1}, o_t, a_{t-1}) \\ p_{\phi_2}(y_t | x_{t-1}, y_{t-1}, z_{t-1}, o_t, a_{t-1}) \\ p_{\phi_3}(z_t | x_t, y_t, o_t, a_{t-1}) \end{array} \right. \quad (34)
\end{array}$$

A notable distinction can be observed between Denoised MDP and IFactor in terms of the assumptions made for the prior and posterior structures. Denoised MDP assumes independent priors for  $x_t$  and  $y_t$ , whereas IFactor only incorporates conditional independence, utilizing  $s_{t-1}^r$  as input for the transition of both  $s_t^{ar}$  and  $s_t^{\bar{ar}}$ . Moreover, the posterior of  $y_t$  receives  $a_{t-1}$  as input, potentially implying controllability. Similarly, the posterior of  $x_t$  incorporates  $z_{t-1}$  as input, which may introduce noise from  $z_{t-1}$  into  $x_t$ . These implementation details can deviate from the original concept. In contrast, our implementation ensures consistency between the prior and posterior, facilitating a clean disentanglement in our factored model.

From the perspective of the objective function, IFactor incorporates two supplementary mutual information constraints, namely  $\mathcal{J}_{\text{RS}}^t$  and  $\mathcal{J}_{\text{AS}}^t$ , to promote disentanglement and improve policy performance.

## References

- [1] P. Spirtes, C. Glymour, and R. Scheines. *Causation, Prediction, and Search*. Springer-Verlag Lectures in Statistics, 1993.
- [2] J. Pearl. *Causality: Models, Reasoning, and Inference*. Cambridge University Press, Cambridge, 2000.
- [3] Biwei Huang, Chaochao Lu, Liu Leqi, José Miguel Hernández-Lobato, Clark Glymour, Bernhard Schölkopf, and Kun Zhang. Action-sufficient state representation learning for control with structural constraints. In *Proceedings of the 39th International Conference on Machine Learning*, volume 162, pages 9260–9279, Baltimore, Maryland, 2022.
- [4] Sébastien Lachapelle, Pau Rodríguez, Yash Sharma, Katie Everett, Rémi Le Priol, Alexandre Lacoste, and Simon Lacoste-Julien. Disentanglement via mechanism sparsity regularization: A new principle for nonlinear ICA. In *Proceedings of the 1st Conference on Causal Learning and Reasoning*, volume 177, pages 428–484, Eureka, CA, 2022.
- [5] Yujia Zheng, Ignavier Ng, and Kun Zhang. On the identifiability of nonlinear ica: Sparsity and beyond. In *Advances in Neural Information Processing Systems 35*, New Orleans, Louisiana, 2022.
- [6] Julius von Kügelgen, Yash Sharma, Luigi Gresele, Wieland Brendel, Bernhard Schölkopf, Michel Besserve, and Francesco Locatello. Self-supervised learning with data augmentations provably isolates content from style. In *Advances in Neural Information Processing Systems 34: Annual Conference on Neural Information Processing Systems*, pages 16451–16467, Virtual Event, 2021.
- [7] Danijar Hafner, Timothy P. Lillicrap, Jimmy Ba, and Mohammad Norouzi. Dream to control: Learning behaviors by latent imagination. In *Proceedings of the 8th International Conference on Learning Representations*, Addis Ababa, Ethiopia, 2020.
- [8] Naftali Tishby, Fernando C. N. Pereira, and William Bialek. The information bottleneck method. *CoRR*, physics/0004057, 2000.
- [9] Alexander A. Alemi, Ian Fischer, Joshua V. Dillon, and Kevin Murphy. Deep variational information bottleneck. In *Proceedings of the 5th International Conference on Learning Representations*, Toulon, France, 2017.
- [10] Mohamed Ishmael Belghazi, Aristide Baratin, Sai Rajeswar, Sherjil Ozair, Yoshua Bengio, R. Devon Hjelm, and Aaron C. Courville. Mutual information neural estimation. In *Proceedings of the 35th International Conference on Machine Learning*, volume 80, pages 530–539, Stockholm, Sweden, 2018.

- 537 [11] Weiran Yao, Guangyi Chen, and Kun Zhang. Temporally disentangled representation learning.  
538 In *Advances in Neural Information Processing Systems 35*, New Orleans, Louisiana, 2022.
- 539 [12] Tongzhou Wang, Simon Du, Antonio Torralba, Phillip Isola, Amy Zhang, and Yuandong Tian.  
540 Denoised mdps: Learning world models better than the world itself. In *Proceedings of the 39th*  
541 *International Conference on Machine Learning*, pages 22591–22612, Baltimore, Maryland,  
542 2022.
- 543 [13] Amy Zhang, Rowan Thomas McAllister, Roberto Calandra, Yarin Gal, and Sergey Levine.  
544 Learning invariant representations for reinforcement learning without reconstruction. In *Pro-*  
545 *ceedings of the 9th International Conference on Learning Representations*, Virtual Event,  
546 Austria, 2021.
- 547 [14] Tuomas Haarnoja, Aurick Zhou, Pieter Abbeel, and Sergey Levine. Soft actor-critic: Off-policy  
548 maximum entropy deep reinforcement learning with a stochastic actor. In *Proceedings of the*  
549 *35th International conference on machine learning*, pages 1861–1870, Stockholm, Sweden,  
550 2018.
- 551 [15] Antonin Raffin, Ashley Hill, Adam Gleave, Anssi Kanervisto, Maximilian Ernestus, and Noah  
552 Dormann. Stable-baselines3: Reliable reinforcement learning implementations. *Journal of*  
553 *Machine Learning Research*, 22:268:1–268:8, 2021.
