# Supplementary material
Source: ML conference proceedings conference paper supplement (https://openreview.net/forum?id=6JJq5TW9Mc)

$$R^2 = 0.9839$$

Estimated latents

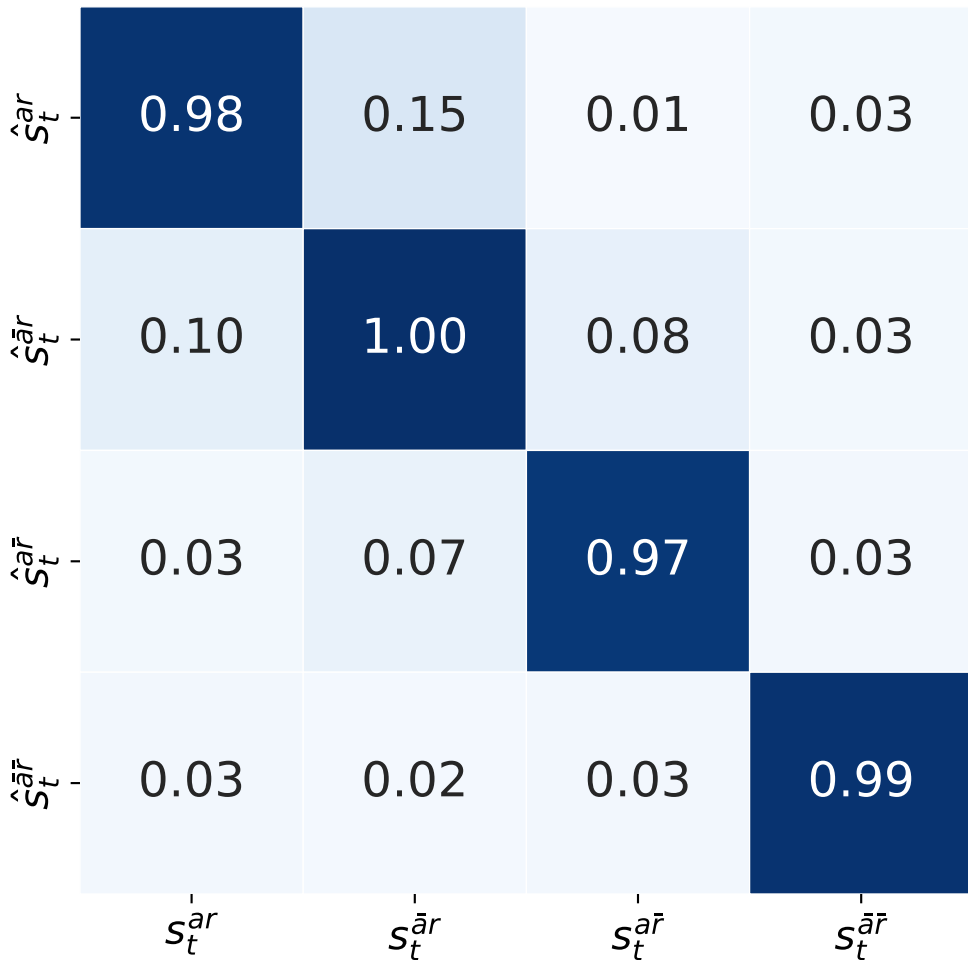

True latents

Supplement: supplementary_material [file attachment]

$$R^2 = 0.9850$$

True latents

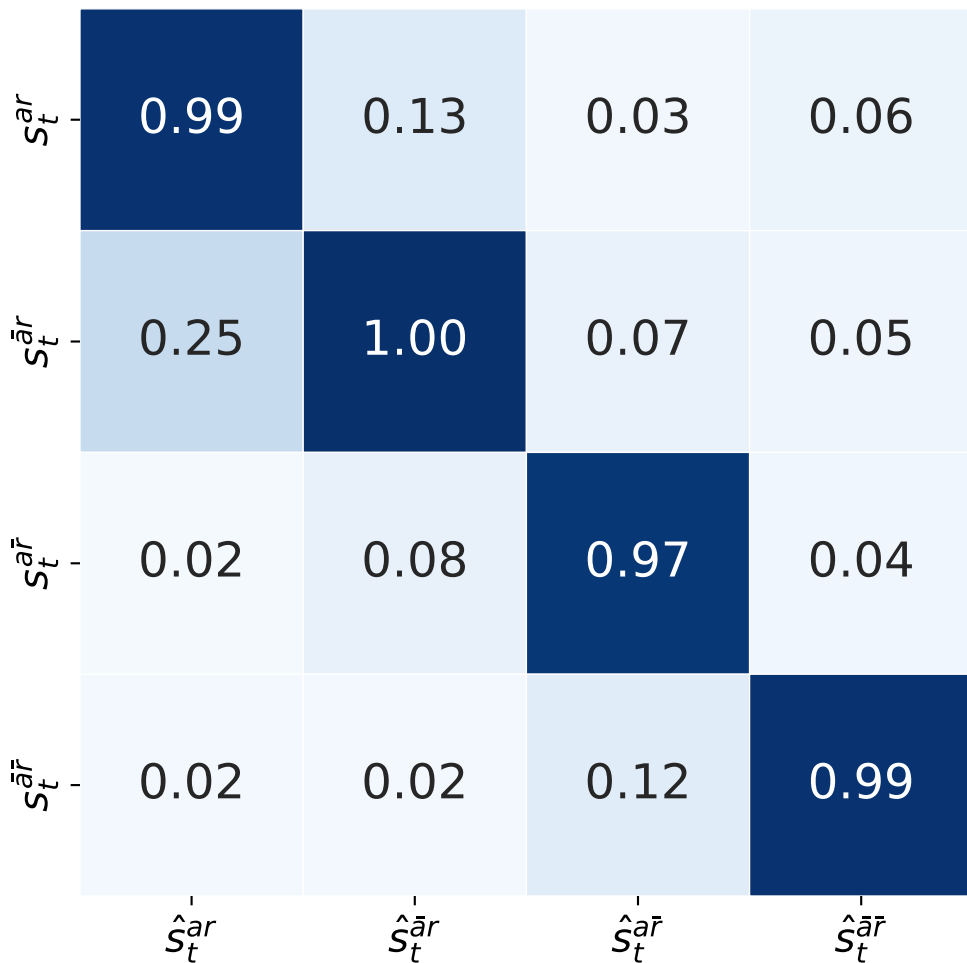

Estimated latents

Supplement: supplementary_material [file attachment]

Robodesk: Using Learned Representation

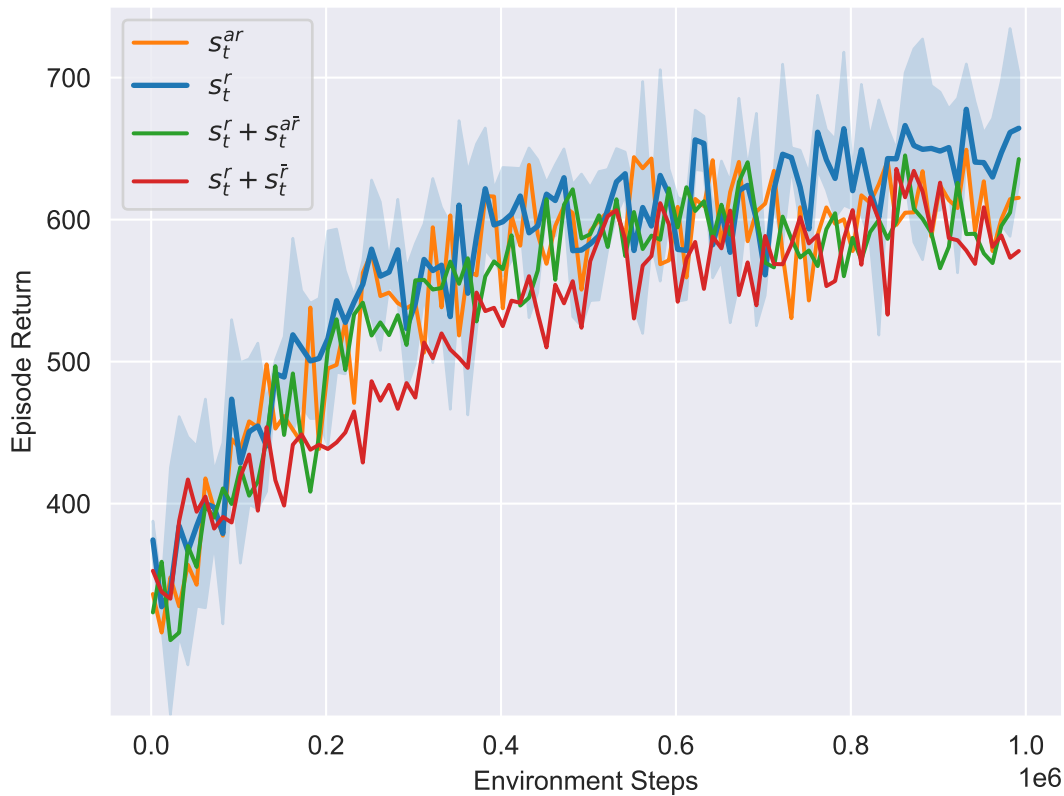

Supplement: supplementary_material [file attachment]

Average  $R^2$ :  $\hat{s}_t$  to  $s_t$

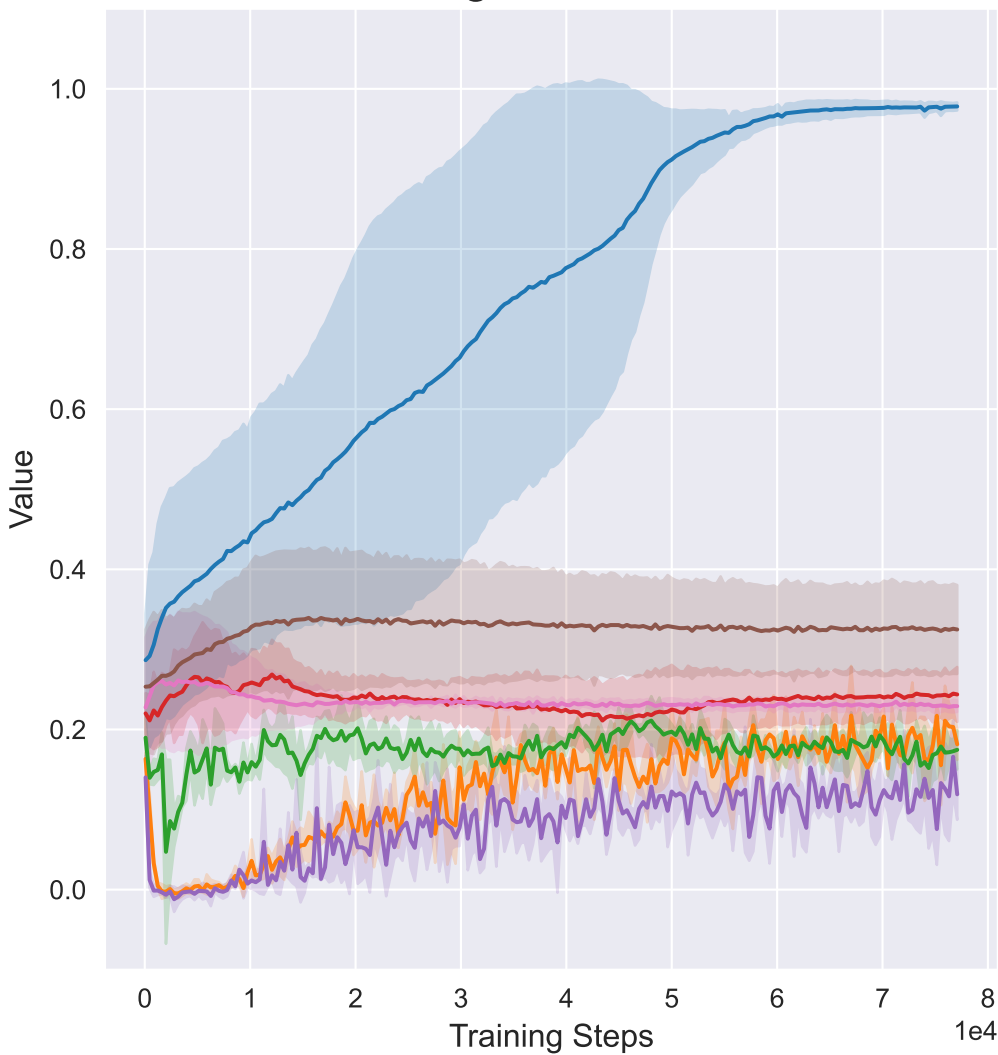

Supplement: supplementary_material [file attachment]

Average  $R^2: s_t$  to  $\hat{s}_t$

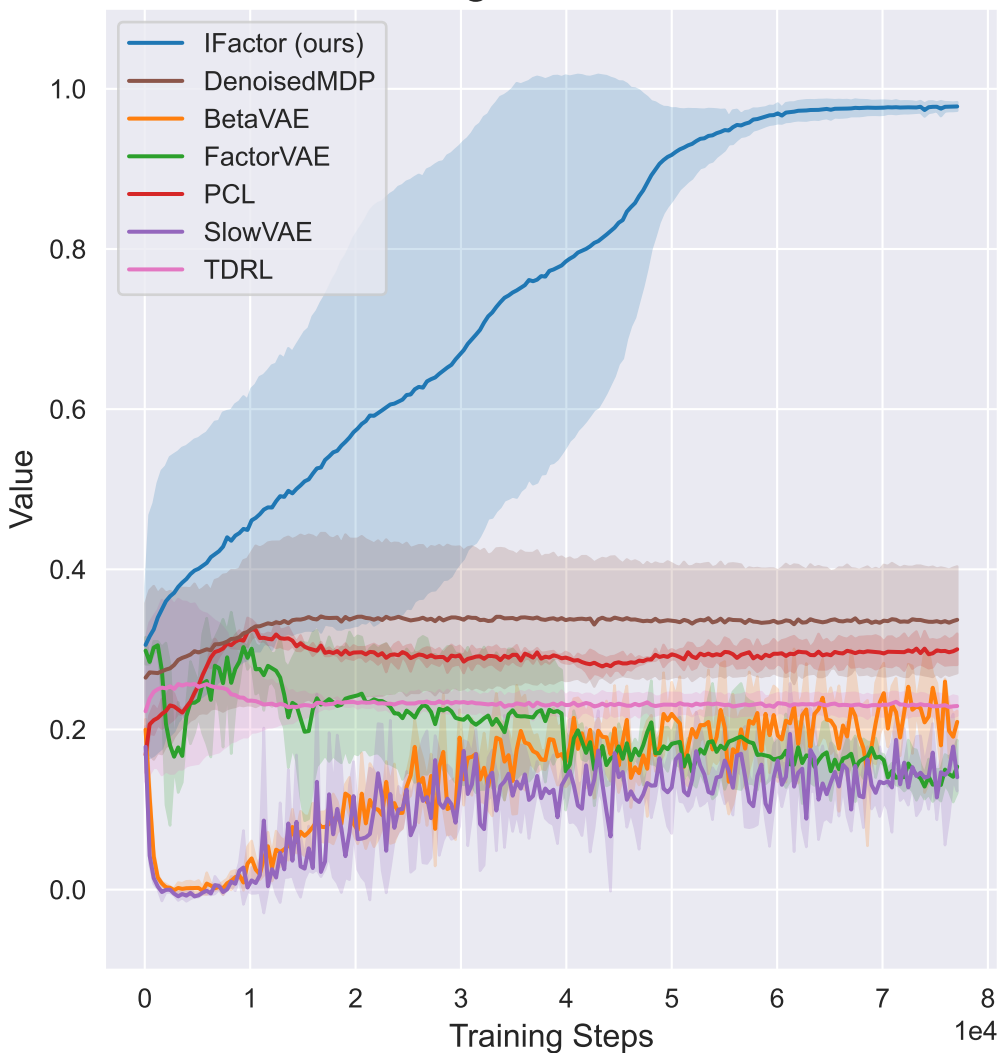

Supplement: supplementary_material [file attachment]
